# Supplementary material for: Physiological changes in captive elephants in Northern Thailand as a result of the COVID-19 tourism ban – muscle, liver, metabolic function, and body condition
Source: PubMed Central journal article supplement (PMC10764436; doi:10.3389/fvets.2023.1303537), 2023-12-21
Supplement: Data_Sheet_1.pdf [file Data_Sheet_1.pdf]

## *Supplementary Material*

# **Physiological Changes in Captive Elephants in Northern Thailand as a Result of the COVID-19 Tourism Ban – Muscle, Liver, Metabolic Function, and Body Condition**

Jarawee Supanta<sup>1,2</sup>, Janine L. Brown<sup>2,3,4†</sup>, Pakkanut Bansiddhi<sup>1,2,3</sup>, Chatchote Thitaram<sup>1,2,3</sup>, Veerasak Punyapornwithaya<sup>1</sup>, Khanittha Punturee<sup>5</sup>, Nopphamas Somboon<sup>6</sup>, Patcharapa Towiboon<sup>2</sup> and Jaruwat Khonmee<sup>1,2,3†\*</sup>

\*Correspondence: Jaruwat Khonmee: jaruwat.khonmee@cmu.ac.th

†Equal contribution: These authors contributed equally to the work and share senior authorship.

## **1 Supplementary Data**

The raw measurements are provided in:

- the mahout questionnaire sheet used to record information during sample collection

## 2 Supplementary Tables

**Supplementary Table 1.** Summary (mean  $\pm$  SEM, range) of tourist, elephant and mahout numbers, and elephant management at six Thailand tourist camps during the COVID-19 pandemic and international travel ban between April 2020 – April 2022. Yearly data are compared to pre-COVID-19 (T00) as described in Supanta et al. (12).

| Parameters                           | Time                     | Camp A                        | Camp B                        | Camp C                        | Camp D                        | Camp E                        | Camp F                        |
|--------------------------------------|--------------------------|-------------------------------|-------------------------------|-------------------------------|-------------------------------|-------------------------------|-------------------------------|
| Participating elephant age (years)   |                          | 32.2 $\pm$ 2.7<br>(19.0-50.0) | 37.9 $\pm$ 2.9<br>(22.0-56.0) | 35.4 $\pm$ 3.3<br>(20.0-56.0) | 40.3 $\pm$ 2.6<br>(28.0-54.0) | 45.2 $\pm$ 2.8<br>(40.0-56.0) | 43.3 $\pm$ 6.7<br>(30.0-50.0) |
| Mahout age (years)                   |                          | 35.7 $\pm$ 2.2<br>(25.0-48.0) | 35.7 $\pm$ 1.8<br>(23.0-47.0) | 42.3 $\pm$ 3.2<br>(18.0-58.0) | 30.9 $\pm$ 2.0<br>(23.0-40.0) | 44.2 $\pm$ 3.4<br>(36.0-51.0) | 25.7 $\pm$ 4.7<br>(20.0-35.0) |
| Tourist number/day                   | T00<br>(Before COVID-19) | 200                           | 600                           | 300                           | 600                           | 50                            | 15                            |
|                                      | T01<br>(Apr 2020)        | 0                             | 4                             | 2                             | 4                             | 4                             | 0                             |
|                                      | T04<br>(Jan-Apr 2021)    | 0                             | 4                             | 2                             | 4                             | 4                             | 0                             |
|                                      | T07<br>(Jan-Apr 2022)    | 6                             | 10                            | 6                             | 10                            | 10                            | 7                             |
| Mahout number/camp                   | T00<br>(Before COVID-19) | 40                            | 66                            | 66                            | 12                            | 10                            | 3                             |
|                                      | T01<br>(Apr 2020)        | 40                            | 54                            | 66                            | 12                            | 10                            | 3                             |
|                                      | T04<br>(Jan-Apr 2021)    | 20                            | 28                            | 39                            | 7                             | 5                             | 3                             |
|                                      | T07<br>(Jan-Apr 2022)    | 18                            | 20                            | 25                            | 4                             | 4                             | 2                             |
| Elephant number/camp <sup>1</sup>    | T00<br>(Before COVID-19) | 13:30                         | 18:36                         | 26:41                         | 0:12                          | 0:12                          | 0:3                           |
|                                      | T01<br>(Apr 2020)        | 13:30                         | 18:36                         | 26:41                         | 0:12                          | 0:12                          | 0:3                           |
|                                      | T04<br>(Jan-Apr 2021)    | 13:41                         | 18:31                         | 26:34                         | 0:8                           | 0:7                           | 0:3                           |
|                                      | T07<br>(Jan-Apr 2022)    | 13:35                         | 18:28                         | 12:28                         | 0:5                           | 0:7                           | 0:3                           |
| Participating elephants <sup>1</sup> | T01<br>(Apr 2020)        | 5:9                           | 4:10                          | 5:7                           | 0:10                          | 0:5                           | 0:3                           |
|                                      | T04<br>(Jan-Apr 2021)    | 5:9                           | 2:10                          | 4:7                           | 0:8                           | 0:5                           | 0:3                           |
|                                      | T07<br>(Jan-Apr 2022)    | 2:8                           | 0:7                           | 1:4                           | 0:6                           | 0:5                           | 0:3                           |
| Chain time (h/day)                   | T00<br>(Before COVID-19) | 16.0                          | 16.0                          | 16.0                          | 16.0                          | 17.0                          | 18.0                          |
|                                      | T01<br>(Apr 2020)        | 22.5                          | 22.0                          | 23.5                          | 16.0                          | 17.0                          | 20.0                          |

|                               |                          |                              |                              |                        |       |                           |       |
|-------------------------------|--------------------------|------------------------------|------------------------------|------------------------|-------|---------------------------|-------|
|                               | T04<br>(Jan-Apr 2021)    | 22.6 ± 0.1<br>(22.5-23.3)    | 48.0                         | 23.5                   | 48.0  | 14.6 ± 0.2<br>(14.0-15.0) | 20.0  |
|                               | T07<br>(Jan-Apr 2022)    | 22.7 ± 0.2<br>(22.5-24.0)    | 24.0                         | 23.5                   | 24.0  | 14.6 ± 0.2<br>(14.0-15.0) | 20.0  |
| Chain length (m)              | T00<br>(Before COVID-19) | 2.0                          | 3.0                          | 1.5                    | 3.0   | 5.0                       | 3.0   |
|                               | T01<br>(Apr 2020)        | 3.9 ± 0.7<br>(1.5-10.0)      | 3.0                          | 1.5                    | 3.0   | 1.2 ± 0.1<br>(1.0-1.5)    | 3.0   |
|                               | T04<br>(Jan-Apr 2021)    | 4.3 ± 0.8<br>(1.5-10.0)      | 3.0                          | 1.5                    | 3.0   | 1.2 ± 0.1<br>(1.0-1.5)    | 2.0   |
|                               | T07<br>(Jan-Apr 2022)    | 5.1 ± 1.0<br>(1.5-10.0)      | 3.0                          | 2.5                    | 3.0   | 1.2 ± 0.1<br>(1.0-1.5)    | 2.0   |
| Walking distance (km/day)     | T00<br>(Before COVID-19) | 6.0                          | 10.0                         | 20.0                   | 6.0   | 2.0                       | 3.0   |
|                               | T01<br>(Apr 2020)        | 1.5                          | 5.6 ± 0.0<br>(0.0-6.0)       | 4.0                    | 1.0   | 1.0                       | 3.0   |
|                               | T04<br>(Jan-Apr 2021)    | 1.4 ± 0.1<br>(0.8-1.5)       | 2.0                          | 1.3 ± 0.0<br>(1.2-1.3) | 0.5   | 0.5                       | 3.0   |
|                               | T07<br>(Jan-Apr 2022)    | 1.1 ± 0.2<br>(0.0-1.5)       | 2.0                          | 2.8 ± 0.8<br>(2.0-6.0) | 1.0   | 2.0                       | 3.0   |
| Amount of roughage (kg/day)   | T00<br>(Before COVID-19) | 200.0                        | 120.0                        | 180.0                  | 120.0 | 180.0                     | 300.0 |
|                               | T01<br>(Apr 2020)        | 192.3 ± 2.8<br>(180.0-200.0) | 139.1 ± 4.6<br>(120.0-150.0) | 180.0                  | 120.0 | 180.0                     | 200.0 |
|                               | T04<br>(Jan-Apr 2021)    | 190.0 ± 3.8<br>(165.0-200.0) | 134.1 ± 6.8<br>(100.0-150.0) | 150.0                  | 120.0 | 180.0                     | 150.0 |
|                               | T07<br>(Jan-Apr 2022)    | 154.6 ± 3.1<br>(150.0-180.0) | 131.8 ± 7.6<br>(100.0-150.0) | 120.0                  | 120.0 | 180.0                     | 150.0 |
| Amount of supplement (kg/day) | T00<br>(Before COVID-19) | 20.0                         | 25.0                         | 25.0                   | 25.0  | 25.0                      | 15.0  |
|                               | T01<br>(Apr 2020)        | 14.2 ± 2.1<br>(5.0-20.0)     | 25.0                         | 25.0                   | 25.0  | 15.0                      | 20.0  |
|                               | T04<br>(Jan-Apr 2021)    | 4.7 ± 0.2<br>(3.0-5.0)       | 8.3 ± 1.2<br>(1.0-10.0)      | 1.0                    | 10.0  | 15.0                      | 5.0   |
|                               | T07<br>(Jan-Apr 2022)    | 10.2 ± 1.8<br>(1.0-15.0)     | 11.9 ± 2.1<br>(1.0-15.0)     | 10.0                   | 10.0  | 15.0                      | 5.0   |

<sup>1</sup>Number of males:females

<sup>a</sup>Elephants were chained for 48 consecutive hours

**Supplementary Table 2.** Time and camp differences in muscle and liver enzymes, lipid profiles, metabolic function and body condition scores (BCS) (mean  $\pm$  SEM, range) in captive Asian elephants (n = 58) in six Thailand tourist camps during the COVID-19 pandemic international travel ban each year between April 2020 – April 2022.

| Parameters                       | Time                  | Camp A                                            | Camp B                                            | Camp C                                           | Camp D                                            | Camp E                                             | Camp F                                            |
|----------------------------------|-----------------------|---------------------------------------------------|---------------------------------------------------|--------------------------------------------------|---------------------------------------------------|----------------------------------------------------|---------------------------------------------------|
| <b>Muscle and liver enzymes</b>  |                       |                                                   |                                                   |                                                  |                                                   |                                                    |                                                   |
| Creatine kinase (U/L)            | T01<br>(Apr 2020)     | 351.0 $\pm$ 40.5 <sup>ab,z</sup><br>(110.0-751.0) | 360.0 $\pm$ 24.0 <sup>b,y</sup><br>(206.0-546.0)  | 405.0 $\pm$ 31.2 <sup>b,y</sup><br>(260.0-650.0) | 372.0 $\pm$ 47.5 <sup>ab,x</sup><br>(198.0-718.0) | 269.0 $\pm$ 39.9 <sup>ab,y</sup><br>(173.0-433.0)  | 233.0 $\pm$ 31.6 <sup>a,x</sup><br>(166.0-300.0)  |
|                                  | T04<br>(Jan-Apr 2021) | 226.0 $\pm$ 13.4 <sup>ab,y</sup><br>(127.8-311.3) | 292.0 $\pm$ 17.6 <sup>c,xy</sup><br>(201.8-378.0) | 190.0 $\pm$ 12.5 <sup>a,x</sup><br>(100.7-255.0) | 257.0 $\pm$ 19.8 <sup>bc,x</sup><br>(168.0-323.5) | 232.0 $\pm$ 25.3 <sup>abc,y</sup><br>(138.0-290.8) | 179.0 $\pm$ 14.8 <sup>a,x</sup><br>(151.5-213.0)  |
|                                  | T07<br>(Jan-Apr 2022) | 101.0 $\pm$ 17.2 <sup>a,x</sup><br>(45.0-241.0)   | 272.0 $\pm$ 27.7 <sup>b,x</sup><br>(133.0-382.0)  | 225.0 $\pm$ 29.6 <sup>b,x</sup><br>(113.0-311.0) | 292.0 $\pm$ 62.9 <sup>ab,x</sup><br>(127.0-570.0) | 101.0 $\pm$ 26.3 <sup>a,x</sup><br>(53.0-212.0)    | 178.0 $\pm$ 28.5 <sup>ab,x</sup><br>(130.0-246.0) |
| Aspartate aminotransferase (U/L) | T01<br>(Apr 2020)     | 20.2 $\pm$ 1.7 <sup>ab,x</sup><br>(11.0-30.0)     | 20.6 $\pm$ 1.1 <sup>b,x</sup><br>(15.0-29.0)      | 18.9 $\pm$ 1.4 <sup>ab,x</sup><br>(13.0-30.0)    | 19.0 $\pm$ 1.2 <sup>ab,x</sup><br>(15.0-28.0)     | 14.6 $\pm$ 1.2 <sup>a,x</sup><br>(11.0-18.0)       | 17.7 $\pm$ 1.0 <sup>ab,x</sup><br>(16.0-20.0)     |
|                                  | T04<br>(Jan-Apr 2021) | 22.3 $\pm$ 1.3 <sup>b,x</sup><br>(14.8-34.0)      | 17.5 $\pm$ 0.9 <sup>a,x</sup><br>(12.0-23.7)      | 19.1 $\pm$ 0.8 <sup>ab,x</sup><br>(14.3-23.0)    | 19.8 $\pm$ 0.8 <sup>ab,x</sup><br>(17.3-24.0)     | 21.8 $\pm$ 2.9 <sup>ab,y</sup><br>(13.8-31.0)      | 24.5 $\pm$ 1.8 <sup>b,y</sup><br>(20.0-27.0)      |
|                                  | T07<br>(Jan-Apr 2022) | 25.9 $\pm$ 1.7 <sup>b,y</sup><br>(19.0-38.0)      | 17.4 $\pm$ 0.7 <sup>a,x</sup><br>(15.0-21.0)      | 21.4 $\pm$ 1.9 <sup>ab,x</sup><br>(16.0-28.0)    | 26.8 $\pm$ 4.5 <sup>b,x</sup><br>(17.0-47.0)      | 20.4 $\pm$ 1.2 <sup>ab,xy</sup><br>(16.0-23.0)     | 26.0 $\pm$ 2.2 <sup>b,y</sup><br>(22.0-31.0)      |
| Alkaline phosphatase (U/L)       | T01<br>(Apr 2020)     | 40.1 $\pm$ 5.0 <sup>ab,x</sup><br>(21.0-90.0)     | 48.2 $\pm$ 3.2 <sup>b,x</sup><br>(31.0-99.0)      | 40.2 $\pm$ 3.9 <sup>ab,x</sup><br>(14.0-65.0)    | 46.2 $\pm$ 3.7 <sup>ab,x</sup><br>(32.0-71.0)     | 41.8 $\pm$ 3.2 <sup>ab,x</sup><br>(28.0-48.0)      | 33.3 $\pm$ 3.4 <sup>a,x</sup><br>(25.0-38.0)      |
|                                  | T04<br>(Jan-Apr 2021) | 44.5 $\pm$ 4.9 <sup>ab,xy</sup><br>(28.0-106.3)   | 50.8 $\pm$ 5.0 <sup>b,x</sup><br>(31.0-80.8)      | 46.7 $\pm$ 3.6 <sup>b,xy</sup><br>(27.0-66.8)    | 50.4 $\pm$ 4.8 <sup>b,x</sup><br>(33.5-80.0)      | 45.4 $\pm$ 3.5 <sup>b,x</sup><br>(36.8-57.3)       | 31.0 $\pm$ 1.7 <sup>a,x</sup><br>(28.5-35.0)      |
|                                  | T07<br>(Jan-Apr 2022) | 61.1 $\pm$ 5.8 <sup>a,y</sup><br>(41.0-146.0)     | 71.2 $\pm$ 7.3 <sup>a,y</sup><br>(52.0-128.0)     | 73.2 $\pm$ 9.01 <sup>a,y</sup><br>(35.0-92.0)    | 57.8 $\pm$ 5.3 <sup>a,y</sup><br>(37.0-108.0)     | 73.8 $\pm$ 7.3 <sup>a,y</sup><br>(52.0-97.0)       | 47.0 $\pm$ 7.4 <sup>a,x</sup><br>(29.0-58.0)      |
| Gamma-glutamyl transferase (U/L) | T01<br>(Apr 2020)     | 5.4 $\pm$ 0.7 <sup>a,y</sup><br>(3.6-13.8)        | 4.8 $\pm$ 0.6 <sup>a,x</sup><br>(1.1-12.0)        | 6.0 $\pm$ 1.0 <sup>a,y</sup><br>(2.6-13.8)       | 5.3 $\pm$ 1.0 <sup>a,x</sup><br>(0.4-9.6)         | 4.1 $\pm$ 0.7 <sup>a,x</sup><br>(1.7-5.2)          | 5.8 $\pm$ 1.0 <sup>a,x</sup><br>(5.1-6.9)         |
|                                  | T04<br>(Jan-Apr 2021) | 3.9 $\pm$ 0.4 <sup>a,x</sup><br>(2.3-7.8)         | 4.6 $\pm$ 0.3 <sup>a,x</sup><br>(3.1-6.7)         | 4.5 $\pm$ 0.5 <sup>a,xy</sup><br>(3.0-7.7)       | 5.8 $\pm$ 0.6 <sup>a,x</sup><br>(4.0-9.0)         | 5.1 $\pm$ 0.6 <sup>a,x</sup><br>(3.1-6.7)          | 4.9 $\pm$ 0.2 <sup>a,x</sup><br>(4.5-5.2)         |
|                                  | T07<br>(Jan-Apr 2022) | 4.2 $\pm$ 0.2 <sup>ab,xy</sup><br>(2.7-5.1)       | 4.5 $\pm$ 0.8 <sup>ab,x</sup><br>(2.6-9.5)        | 3.2 $\pm$ 0.3 <sup>a,x</sup><br>(2.6-4.2)        | 5.5 $\pm$ 0.8 <sup>b,x</sup><br>(3.7-9.7)         | 4.8 $\pm$ 0.7 <sup>ab,x</sup><br>(2.5-6.6)         | 4.9 $\pm$ 0.5 <sup>ab,x</sup><br>(3.7-5.8)        |
| <b>Lipid profiles</b>            |                       |                                                   |                                                   |                                                  |                                                   |                                                    |                                                   |
| Total cholesterol (mg/dl)        | T01<br>(Apr 2020)     | 59.0 $\pm$ 3.5 <sup>c,y</sup><br>(37.0-124.0)     | 43.6 $\pm$ 2.5 <sup>ab,y</sup><br>(32.0-68.0)     | 46.2 $\pm$ 2.1 <sup>b,y</sup><br>(32.0-59.0)     | 35.3 $\pm$ 2.6 <sup>a,x</sup><br>(26.0-51.0)      | 44.6 $\pm$ 2.5 <sup>ab,x</sup><br>(36.0-51.0)      | 50.3 $\pm$ 0.3 <sup>bc,z</sup><br>(50.0-51.0)     |
|                                  | T04<br>(Jan-Apr 2021) | 48.6 $\pm$ 2.4 <sup>b,x</sup><br>(35.3-70.0)      | 35.0 $\pm$ 1.4 <sup>a,x</sup><br>(29.8-46.0)      | 41.4 $\pm$ 1.7 <sup>b,xy</sup><br>(32.5-50.0)    | 37.9 $\pm$ 3.6 <sup>ab,x</sup><br>(30.5-63.0)     | 45.1 $\pm$ 4.0 <sup>b,x</sup><br>(34.5-56.3)       | 45.4 $\pm$ 0.7 <sup>b,y</sup><br>(43.8-46.8)      |
|                                  | T07<br>(Jan-Apr 2022) | 42.3 $\pm$ 3.0 <sup>b,x</sup><br>(21.0-59.0)      | 31.1 $\pm$ 1.1 <sup>a,x</sup><br>(27.0-36.0)      | 36.8 $\pm$ 1.8 <sup>ab,x</sup><br>(31.0-43.0)    | 38.0 $\pm$ 3.0 <sup>ab,x</sup><br>(29.0-51.0)     | 44.0 $\pm$ 3.0 <sup>b,x</sup><br>(35.0-54.0)       | 34.0 $\pm$ 2.2 <sup>ab,x</sup><br>(29.0-38.0)     |
| Triglycerides (mg/dl)            | T01<br>(Apr 2020)     | 39.2 $\pm$ 2.5 <sup>c,z</sup><br>(22.0-55.0)      | 26.8 $\pm$ 2.5 <sup>ab,x</sup><br>(15.0-45.0)     | 21.6 $\pm$ 1.9 <sup>a,x</sup><br>(14.0-36.0)     | 31.6 $\pm$ 1.9 <sup>bc,y</sup><br>(23.0-40.0)     | 55.0 $\pm$ 3.7 <sup>d,z</sup><br>(42.0-67.0)       | 42.0 $\pm$ 4.0 <sup>cd,y</sup><br>(33.0-50.0)     |
|                                  | T04<br>(Jan-Apr 2021) | 22.8 $\pm$ 1.5 <sup>b,y</sup><br>(13.5-36.0)      | 19.5 $\pm$ 1.5 <sup>ab,x</sup><br>(10.5-27.8)     | 17.1 $\pm$ 1.1 <sup>a,x</sup><br>(11.5-22.0)     | 16.1 $\pm$ 1.4 <sup>a,x</sup><br>(10.8-24.0)      | 17.2 $\pm$ 0.9 <sup>a,y</sup><br>(14.8-21.0)       | 19.2 $\pm$ 4.5 <sup>ab,x</sup><br>(11.0-29.8)     |

|                                  |                       |                                              |                                              |                                              |                                              |                                                |                                               |
|----------------------------------|-----------------------|----------------------------------------------|----------------------------------------------|----------------------------------------------|----------------------------------------------|------------------------------------------------|-----------------------------------------------|
|                                  | T07<br>(Jan-Apr 2022) | 10.9 ± 1.0 <sup>a,x</sup><br>(7.0-16.0)      | 16.6 ± 2.5 <sup>ab,x</sup><br>(9.0-25.0)     | 18.2 ± 2.4 <sup>b,x</sup><br>(12.0-25.0)     | 17.7 ± 2.2 <sup>b,x</sup><br>(10.0-27.0)     | 13.0 ± 1.3 <sup>ab,x</sup><br>(10.0-18.0)      | 14.3 ± 4.0 <sup>ab,x</sup><br>(8.0-24.0)      |
| Low density lipoprotein (mg/dl)  | T01<br>(Apr 2020)     | 47.6 ± 4.2 <sup>c,y</sup><br>(21.7-75.2)     | 29.1 ± 2.0 <sup>ab,y</sup><br>(20.3-46.9)    | 29.9 ± 1.5 <sup>ab,y</sup><br>(19.6-37.1)    | 24.4 ± 2.3 <sup>a,x</sup><br>(15.4-38.2)     | 33.6 ± 2.4 <sup>b,x</sup><br>(25.6-40.2)       | 32.4 ± 1.5 <sup>b,y</sup><br>(29.2-35.7)      |
|                                  | T04<br>(Jan-Apr 2021) | 31.0 ± 1.5 <sup>b,x</sup><br>(20.6-41.4)     | 21.7 ± 1.1 <sup>a,xy</sup><br>(15.6-28.1)    | 25.8 ± 1.3 <sup>ab,xy</sup><br>(20.1-33.9)   | 23.9 ± 2.8 <sup>ab,x</sup><br>(17.1-43.3)    | 28.7 ± 2.8 <sup>ab,x</sup><br>(20.4-36.6)      | 29.0 ± 0.3 <sup>b,y</sup><br>(28.3-29.5)      |
|                                  | T07<br>(Jan-Apr 2022) | 26.1 ± 2.5 <sup>b,x</sup><br>(8.9-40.5)      | 17.7 ± 0.8 <sup>a,x</sup><br>(15.6-21.5)     | 22.4 ± 1.2 <sup>b,x</sup><br>(18.4-26.2)     | 21.4 ± 1.8 <sup>ab,x</sup><br>(15.0-26.6)    | 27.0 ± 2.4 <sup>b,x</sup><br>(21.8-35.2)       | 21.9 ± 1.5 <sup>ab,x</sup><br>(19.2-25.4)     |
| High density lipoprotein (mg/dl) | T01<br>(Apr 2020)     | 14.4 ± 1.1 <sup>a,x</sup><br>(9.5-33.2)      | 19.0 ± 1.1 <sup>b,y</sup><br>(13.8-31.1)     | 11.6 ± 0.6 <sup>a,y</sup><br>(8.6-15.9)      | 13.6 ± 0.9 <sup>a,y</sup><br>(9.3-18.1)      | 13.1 ± 0.5 <sup>a,x</sup><br>(11.8-14.7)       | 11.9 ± 0.8 <sup>a,xy</sup><br>(10.8-13.9)     |
|                                  | T04<br>(Jan-Apr 2021) | 11.9 ± 0.7 <sup>ab,x</sup><br>(2.3-7.8)      | 9.8 ± 0.3 <sup>a,x</sup><br>(3.1-6.7)        | 11.3 ± 0.3 <sup>b,y</sup><br>(3.0-7.7)       | 10.4 ± 1.0 <sup>ab,x</sup><br>(8.4-17.4)     | 11.2 ± 0.8 <sup>ab,xy</sup><br>(3.1-6.7)       | 12.0 ± 1.2 <sup>ab,y</sup><br>(4.4-5.2)       |
|                                  | T07<br>(Jan-Apr 2022) | 11.3 ± 0.7 <sup>a,x</sup><br>(8.8-15.5)      | 9.3 ± 0.5 <sup>a,x</sup><br>(7.3-11.1)       | 9.3 ± 0.2 <sup>a,x</sup><br>(8.5-9.9)        | 11.2 ± 1.2 <sup>a,xy</sup><br>(8.8-17.0)     | 11.1 ± 0.7 <sup>a,x</sup><br>(8.4-12.4)        | 8.3 ± 1.1 <sup>a,x</sup><br>(6.7-10.9)        |
| <b>Metabolic functions</b>       |                       |                                              |                                              |                                              |                                              |                                                |                                               |
| Plasma glucose (mg/dl)           | T01<br>(Apr 2020)     | 90.0 ± 2.3 <sup>bc,x</sup><br>(78.0-113.0)   | 95.0 ± 3.8 <sup>c,y</sup><br>(78.0-123.0)    | 79.2 ± 2.5 <sup>a,x</sup><br>(61.0-92.0)     | 92.5 ± 3.7 <sup>c,x</sup><br>(76.0-118.0)    | 89.0 ± 5.4 <sup>abc,x</sup><br>(77.0-104.0)    | 75.3 ± 4.7 <sup>ab,x</sup><br>(65.0-85.0)     |
|                                  | T04<br>(Jan-Apr 2021) | 109.8 ± 5.5 <sup>c,y</sup><br>(89.0-150.8)   | 87.6 ± 2.3 <sup>b,x</sup><br>(77.0-101.0)    | 74.7 ± 1.6 <sup>a,x</sup><br>(62.8-83.0)     | 93.2 ± 3.1 <sup>bc,x</sup><br>(83.5-113.3)   | 75.6 ± 5.9 <sup>ab,x</sup><br>(61.5-93.8)      | 70.7 ± 3.4 <sup>a,x</sup><br>(63.0-77.3)      |
|                                  | T07<br>(Jan-Apr 2022) | 124.8 ± 10.0 <sup>bc,y</sup><br>(77.0-169.0) | 94.3 ± 6.2 <sup>ab,xy</sup><br>(79.0-132.0)  | 95.2 ± 13.5 <sup>abc,x</sup><br>(71.0-154.0) | 88.2 ± 2.3 <sup>a,x</sup><br>(82.0-99.0)     | 117.6 ± 3.8 <sup>c,y</sup><br>(107.0-131.0)    | 110.3 ± 10.6 <sup>bc,y</sup><br>(87.0-132.0)  |
| Serum insulin (µg/l)             | T01<br>(Apr 2020)     | 0.38 ± 0.9 <sup>ab,x</sup><br>(0.14-1.03)    | 0.91 ± 0.17 <sup>b,y</sup><br>(0.18-1.82)    | 0.25 ± 0.06 <sup>a,x</sup><br>(0.13-0.47)    | 0.62 ± 0.26 <sup>ab,xy</sup><br>(0.12-2.29)  | 0.24 ± 0.05 <sup>a,x</sup><br>(0.17-0.31)      | 0.33 ± 0.10 <sup>a,y</sup><br>(0.15-0.52)     |
|                                  | T04<br>(Jan-Apr 2021) | 1.13 ± 0.18 <sup>b,xy</sup><br>(0.32-2.87)   | 0.94 ± 0.14 <sup>b,y</sup><br>(0.53-3.34)    | 0.27 ± 0.03 <sup>a,x</sup><br>(0.10-0.48)    | 1.00 ± 0.18 <sup>ab,y</sup><br>(0.28-2.74)   | 0.52 ± 0.14 <sup>ab,x</sup><br>(0.13-1.23)     | 0.19 ± 0.03 <sup>a,x</sup><br>(0.12-0.23)     |
|                                  | T07<br>(Jan-Apr 2022) | 1.30 ± 0.39 <sup>ab,y</sup><br>(0.16-8.80)   | 0.25 ± 0.06 <sup>a,x</sup><br>(0.10-6.75)    | 0.47 ± 0.22 <sup>ab,x</sup><br>(0.16-0.78)   | 0.26 ± 0.03 <sup>a,x</sup><br>(0.17-0.33)    | 1.03 ± 0.16 <sup>b,y</sup><br>(0.54-1.54)      | 1.39 ± 0.47 <sup>ab,y</sup><br>(0.73-2.06)    |
| Glucose to insulin ratio         | T01<br>(Apr 2020)     | 362.0 ± 64.3 <sup>ab,y</sup><br>(88.0-614.4) | 166.0 ± 37.5 <sup>a,x</sup><br>(62.0-164.0)  | 435.0 ± 83.0 <sup>b,y</sup><br>(154.4-674.6) | 233.0 ± 53.1 <sup>ab,x</sup><br>(51.6-706.7) | 238.0 ± 71.3 <sup>ab,xy</sup><br>(137.5-339.3) | 287.0 ± 84.6 <sup>ab,y</sup><br>(164.8-493.3) |
|                                  | T04<br>(Jan-Apr 2021) | 188.0 ± 26.5 <sup>a,x</sup><br>(60.6-362.8)  | 172.0 ± 32.5 <sup>a,x</sup><br>(62.0-403.1)  | 342.0 ± 28.7 <sup>b,x</sup><br>(202.2-739.4) | 284.0 ± 53.6 <sup>ab,x</sup><br>(86.5-506.2) | 305.0 ± 50.5 <sup>ab,z</sup><br>(199.5-516.4)  | 374.0 ± 14.8 <sup>b,z</sup><br>(353.4-782.0)  |
|                                  | T07<br>(Jan-Apr 2022) | 127.0 ± 48.9 <sup>a,xy</sup><br>(19.2-518.7) | 217.0 ± 67.2 <sup>ab,x</sup><br>(19.6-932.9) | 557.0 ± 0.0 <sup>c,z</sup><br>(103.8-756.9)  | 375.0 ± 45.1 <sup>b,y</sup><br>(247.4-521.9) | 127.0 ± 18.2 <sup>a,x</sup><br>(85.0-200.1)    | 118.0 ± 45.2 <sup>a,x</sup><br>(54.3-182.2)   |
| Serum fructosamine (mM)          | T01<br>(Apr 2020)     | 1.39 ± 0.03 <sup>a,x</sup><br>(1.20-1.59)    | 1.37 ± 0.02 <sup>a,x</sup><br>(1.26-1.54)    | 1.35 ± 0.05 <sup>a,x</sup><br>(1.12-1.49)    | 1.41 ± 0.05 <sup>a,x</sup><br>(1.14-1.60)    | 1.44 ± 0.07 <sup>a,x</sup><br>(1.24-1.71)      | 1.34 ± 0.05 <sup>a,x</sup><br>(1.22-1.41)     |
|                                  | T04<br>(Jan-Apr 2021) | 1.42 ± 0.03 <sup>a,x</sup><br>(1.23-1.52)    | 1.35 ± 0.01 <sup>a,x</sup><br>(1.25-1.40)    | 1.36 ± 0.02 <sup>a,x</sup><br>(1.20-1.46)    | 1.34 ± 0.03 <sup>ac,x</sup><br>(1.19-1.51)   | 1.42 ± 0.03 <sup>a,x</sup><br>(1.38-1.61)      | 1.41 ± 0.02 <sup>a,x</sup><br>(1.38-1.45)     |
|                                  | T07<br>(Jan-Apr 2022) | 1.51 ± 0.04 <sup>ab,y</sup><br>(1.30-1.69)   | 1.43 ± 0.02 <sup>a,y</sup><br>(1.37-1.50)    | 1.44 ± 0.02 <sup>a,x</sup><br>(1.38-1.50)    | 1.43 ± 0.04 <sup>a,x</sup><br>(1.31-1.61)    | 1.46 ± 0.04 <sup>ab,x</sup><br>(1.30-1.52)     | 1.54 ± 0.01 <sup>b,y</sup><br>(1.52-1.57)     |
| Body condition score (1-5)       | T01<br>(Apr 2020)     | 4.1 ± 0.2 <sup>a,z</sup><br>(3.0-5.0)        | 4.4 ± 0.2 <sup>a,y</sup><br>(3.0-5.0)        | 3.6 ± 0.2 <sup>a,x</sup><br>(2.5-5.0)        | 4.4 ± 0.2 <sup>a,y</sup><br>(4.0-5.0)        | 4.4 ± 0.2 <sup>a,y</sup><br>(3.0-5.0)          | 2.5 ± 1.0 <sup>a,y</sup><br>(3.0-5.0)         |
|                                  | T04<br>(Jan-Apr 2021) | 3.2 ± 0.1 <sup>bc,y</sup><br>(2.0-5.0)       | 4.1 ± 0.2 <sup>d,xy</sup><br>(2.0-5.0)       | 3.1 ± 0.2 <sup>b,x</sup><br>(2.0-5.0)        | 3.9 ± 0.2 <sup>cd,y</sup><br>(2.0-4.0)       | 3.2 ± 0.4 <sup>abcd,y</sup><br>(3.0-4.0)       | 1.8 ± 0.3 <sup>a,x</sup><br>(1.0-3.0)         |
|                                  | T07<br>(Jan-Apr 2022) | 2.8 ± 0.2 <sup>b,x</sup><br>(2.0-4.0)        | 3.4 ± 0.2 <sup>b,x</sup><br>(3.0-4.0)        | 3.0 ± 0.4 <sup>b,x</sup><br>(2.0-4.0)        | 2.9 ± 0.2 <sup>b,x</sup><br>(3.0-5.0)        | 2.8 ± 0.2 <sup>b,x</sup><br>(2.0-3.0)          | 1.6 ± 0.0 <sup>a,x</sup><br>(1.0-3.0)         |

<sup>a,b,c,d</sup>Values in the same row are significantly different across camps (P <0.001).

<sup>x,y,z</sup>Values in the same column are significantly different across time periods (P <0.001).

**Supplementary Table 3.** Univariate and multivariate GEE analyses of demographic and camp management variables associated with serum creatine kinase concentrations.

| Variables                        |        | N  | Univariate analysis |        |         | Multivariate analysis |        |         |
|----------------------------------|--------|----|---------------------|--------|---------|-----------------------|--------|---------|
|                                  |        |    | Estimate            | SE     | P value | Estimate              | SE     | P value |
| <b>Sex</b>                       |        |    |                     |        |         |                       |        |         |
|                                  | Male   | 14 | Reference           |        |         |                       |        |         |
|                                  | Female | 44 | 5.780               | 22.100 | 0.790   |                       |        |         |
| <b>Age</b>                       |        |    | -0.360              | 0.882  | 0.680   |                       |        |         |
| <b>Time</b>                      |        |    |                     |        |         |                       |        |         |
|                                  | T01    | 58 | Reference           |        |         |                       |        |         |
|                                  | T02    | 54 | -44.200             | 20.600 | 0.032   | -44.191               | 19.682 | 0.025   |
|                                  | T03    | 51 | 13.000              | 25.500 | 0.611   | 28.946                | 33.948 | 0.394   |
|                                  | T04    | 46 | -116.700            | 19.200 | <0.001  | -100.809              | 34.192 | 0.003   |
|                                  | T05    | 40 | 27.300              | 32.000 | 0.395   | 11.844                | 38.994 | 0.761   |
|                                  | T06    | 38 | 7.600               | 36.700 | 0.836   | 13.882                | 42.613 | 0.745   |
|                                  | T07    | 36 | -157.900            | 25.200 | <0.001  | -134.898              | 30.614 | <0.001  |
| <b>Camp</b>                      |        |    |                     |        |         |                       |        |         |
|                                  | A      | 14 | 57.500              | 22.500 | 0.011   | 9.415                 | 24.141 | 0.103   |
|                                  | B      | 14 | 149.500             | 23.700 | <0.001  | 116.735               | 26.061 | <0.001  |
|                                  | C      | 12 | 72.200              | 23.700 | 0.002   | 58.208                | 23.896 | 0.015   |
|                                  | D      | 10 | 117.400             | 25.900 | <0.001  | 132.002               | 33.814 | <0.001  |
|                                  | E      | 5  | -32.400             | 22.000 | 0.141   | -11.282               | 28.042 | 0.687   |
|                                  | F      | 3  | Reference           |        |         |                       |        |         |
| <b>Walking distance (km/day)</b> |        |    | 13.300              | 3.880  | 0.001   | 2.496                 | 6.519  | 0.702   |
| <b>Chain length (m)</b>          |        |    | 11.170              | 5.970  | 0.061   | 3.128                 | 5.974  | 0.601   |
| <b>Chain hour (h/day)</b>        |        |    | 6.400               | 1.130  | <0.001  | 3.488                 | 1.350  | 0.010   |
| <b>Roughage (kg/day)</b>         |        |    | -0.883              | 0.291  | 0.002   | 0.553                 | 0.418  | 0.186   |
| <b>Supplement (kg/day)</b>       |        |    | 2.502               | 0.954  | 0.009   | 0.261                 | 1.786  | 0.884   |

SE =Standard error

Variables having a P value &lt;0.15 at the univariate analysis were included in the multivariate analysis.

**Supplementary Table 4.** Univariate and multivariate GEE analyses of demographic and camp management variables associated with aspartate aminotransferase activity.

| Variables                        |        | N  | Univariate analysis |       |         | Multivariate analysis |       |         |
|----------------------------------|--------|----|---------------------|-------|---------|-----------------------|-------|---------|
|                                  |        |    | Estimate            | SE    | P value | Estimate              | SE    | P value |
| <b>Sex</b>                       |        |    |                     |       |         |                       |       |         |
|                                  | Male   | 14 | Reference           |       |         |                       |       |         |
|                                  | Female | 44 | -2.742              | 0.863 | 0.002   | -1.852                | 0.971 | 0.057   |
| <b>Age</b>                       |        |    | -0.054              | 0.029 | 0.059   | 0.010                 | 0.027 | 0.714   |
| <b>Time</b>                      |        |    |                     |       |         |                       |       |         |
|                                  | T01    | 58 | Reference           |       |         |                       |       |         |
|                                  | T02    | 54 | 0.314               | 0.809 | 0.698   | 0.226                 | 0.785 | 0.774   |
|                                  | T03    | 51 | 2.227               | 0.847 | 0.009   | 2.623                 | 1.200 | 0.029   |
|                                  | T04    | 46 | 1.176               | 0.925 | 0.203   | 1.904                 | 1.446 | 0.188   |
|                                  | T05    | 40 | 5.251               | 1.472 | <0.001  | 5.189                 | 1.516 | 0.001   |
|                                  | T06    | 38 | 4.494               | 1.292 | 0.042   | 3.244                 | 1.438 | 0.024   |
|                                  | T07    | 36 | 3.804               | 1.308 | 0.004   | 4.467                 | 1.294 | 0.001   |
| <b>Camp</b>                      |        |    |                     |       |         |                       |       |         |
|                                  | A      | 14 | -1.440              | 1.163 | 0.216   | -2.962                | 1.050 | 0.005   |
|                                  | B      | 14 | -4.201              | 1.074 | <0.001  | -4.928                | 1.331 | <0.001  |
|                                  | C      | 12 | -2.454              | 1.207 | 0.042   | -2.049                | 1.314 | 0.119   |
|                                  | D      | 10 | -2.753              | 1.250 | 0.028   | -3.127                | 1.390 | 0.024   |
|                                  | E      | 5  | -4.738              | 1.287 | <0.001  | -4.059                | 1.222 | <0.001  |
|                                  | F      | 3  | Reference           |       |         |                       |       |         |
| <b>Walking distance (km/day)</b> |        |    | -0.188              | 0.144 | 0.190   |                       |       |         |
| <b>Chain length (m)</b>          |        |    | 0.883               | 0.242 | <0.001  | 0.837                 | 0.352 | 0.017   |
| <b>Chain hour (h/day)</b>        |        |    | 0.050               | 0.043 | 0.240   | -0.008                | 0.060 | 0.890   |
| <b>Roughage (kg/day)</b>         |        |    | -0.005              | 0.011 | 0.660   |                       |       |         |
| <b>Supplement (kg/day)</b>       |        |    | -0.188              | 0.038 | <0.001  | 0.040                 | 0.078 | 0.604   |

SE =Standard error

Variables having a P value &lt;0.15 at the univariate analysis were included in the multivariate analysis.

**Supplementary Table 5.** Univariate and multivariate GEE analyses of demographic and camp management variables associated with alkaline phosphatase activity.

| Variables                        |        | N  | Univariate analysis |       |         | Multivariate analysis |       |         |
|----------------------------------|--------|----|---------------------|-------|---------|-----------------------|-------|---------|
|                                  |        |    | Estimate            | SE    | P value | Estimate              | SE    | P value |
| <b>Sex</b>                       |        |    |                     |       |         |                       |       |         |
|                                  | Male   | 14 | Reference           |       |         |                       |       |         |
|                                  | Female | 44 | -3.280              | 2.610 | 0.250   |                       |       |         |
| <b>Age</b>                       |        |    | -0.572              | 0.101 | <0.001  | -0.688                | 0.085 | <0.001  |
| <b>Time</b>                      |        |    |                     |       |         |                       |       |         |
|                                  | T01    | 58 | Reference           |       |         |                       |       |         |
|                                  | T02    | 54 | -1.440              | 2.620 | 0.583   | -1.168                | 2.272 | 0.607   |
|                                  | T03    | 51 | 3.130               | 2.580 | 0.225   | 3.414                 | 3.297 | 0.300   |
|                                  | T04    | 46 | 4.100               | 2.920 | 0.161   | 3.638                 | 3.808 | 0.339   |
|                                  | T05    | 40 | 9.120               | 3.660 | 0.013   | 8.379                 | 4.206 | 0.046   |
|                                  | T06    | 38 | 18.890              | 3.810 | <0.001  | 18.965                | 4.020 | <0.001  |
|                                  | T07    | 36 | 22.040              | 3.760 | <0.001  | 23.660                | 3.944 | <0.001  |
| <b>Camp</b>                      |        |    |                     |       |         |                       |       |         |
|                                  | A      | 14 | 11.690              | 3.070 | <0.001  | 4.547                 | 2.676 | 0.089   |
|                                  | B      | 14 | 18.090              | 3.090 | <0.001  | 18.388                | 3.293 | <0.001  |
|                                  | C      | 12 | 12.860              | 3.000 | <0.001  | 9.833                 | 2.615 | <0.001  |
|                                  | D      | 10 | 17.150              | 3.330 | <0.001  | 20.714                | 4.160 | <0.001  |
|                                  | E      | 5  | 16.900              | 3.830 | <0.001  | 19.431                | 3.767 | <0.001  |
|                                  | F      | 3  | Reference           |       |         |                       |       |         |
| <b>Walking distance (km/day)</b> |        |    | -0.980              | 0.509 | 0.054   | 0.147                 | 0.765 | 0.848   |
| <b>Chain length (m)</b>          |        |    | 0.877               | 0.796 | 0.270   |                       |       |         |
| <b>Chain hour (h/day)</b>        |        |    | 0.441               | 0.153 | 0.004   | 0.249                 | 0.154 | 0.107   |
| <b>Roughage (kg/day)</b>         |        |    | -0.132              | 0.040 | <0.001  | 0.091                 | 0.052 | 0.078   |
| <b>Supplement (kg/day)</b>       |        |    | -0.321              | 0.118 | 0.007   | -0.119                | 0.193 | 0.538   |

SE =Standard error

Variables having a P value &lt;0.15 at the univariate analysis were included in the multivariate analysis.



**Supplementary Table 6.** Univariate and multivariate GEE analyses of demographic and camp management variables associated with gamma-glutamyl transferase activity.

| Variables                        |        | N  | Univariate analysis |       |         | Multivariate analysis |       |         |
|----------------------------------|--------|----|---------------------|-------|---------|-----------------------|-------|---------|
|                                  |        |    | Estimate            | SE    | P value | Estimate              | SE    | P value |
| <b>Sex</b>                       |        |    |                     |       |         |                       |       |         |
|                                  | Male   | 14 | Reference           |       |         |                       |       |         |
|                                  | Female | 44 | -0.333              | 0.343 | 0.330   |                       |       |         |
| <b>Age</b>                       |        |    | 0.038               | 0.010 | <0.001  | 0.040                 | 0.012 | <0.001  |
| <b>Time</b>                      |        |    |                     |       |         |                       |       |         |
|                                  | T01    | 58 | Reference           |       |         |                       |       |         |
|                                  | T02    | 54 | 0.033               | 0.443 | 0.942   | 0.037                 | 0.431 | 0.931   |
|                                  | T03    | 51 | 0.051               | 0.406 | 0.900   | 0.097                 | 0.417 | 0.816   |
|                                  | T04    | 46 | -0.836              | 0.417 | 0.045   | -0.801                | 0.416 | 0.054   |
|                                  | T05    | 40 | -0.117              | 0.470 | 0.804   | -0.101                | 0.474 | 0.831   |
|                                  | T06    | 38 | -0.097              | 0.457 | 0.832   | 0.030                 | 0.489 | 0.951   |
|                                  | T07    | 36 | -0.799              | 0.453 | 0.078   | -0.728                | 0.483 | 0.131   |
| <b>Camp</b>                      |        |    |                     |       |         |                       |       |         |
|                                  | A      | 14 | -0.337              | 0.287 | 0.240   | 0.069                 | 0.352 | 0.845   |
|                                  | B      | 14 | -0.251              | 0.298 | 0.401   | -0.015                | 0.338 | 0.965   |
|                                  | C      | 12 | -0.576              | 0.340 | 0.090   | -0.284                | 0.381 | 0.456   |
|                                  | D      | 10 | 0.663               | 0.375 | 0.077   | 0.948                 | 0.421 | 0.024   |
|                                  | E      | 5  | -0.453              | 0.307 | 0.139   | -0.537                | 0.338 | 0.113   |
|                                  | F      | 3  | Reference           |       |         |                       |       |         |
| <b>Walking distance (km/day)</b> |        |    | 0.0160              | 0.070 | 0.820   |                       |       |         |
| <b>Chain length (m)</b>          |        |    | -0.011              | 0.061 | 0.850   |                       |       |         |
| <b>Chain hour (h/day)</b>        |        |    | 0.005               | 0.012 | 0.660   |                       |       |         |
| <b>Roughage (kg/day)</b>         |        |    | -0.007              | 0.004 | 0.140   | 0.003                 | 0.006 | 0.614   |
| <b>Supplement (kg/day)</b>       |        |    | 0.019               | 0.017 | 0.240   |                       |       |         |

SE =Standard error

Variables having a P value &lt;0.15 at the univariate analysis were included in the multivariate analysis.

**Supplementary Table 7.** Univariate and multivariate GEE analyses of demographic and camp management variables associated with total cholesterol concentrations.

| Variables                        |        | N  | Univariate analysis |       |         | Multivariate analysis |       |         |
|----------------------------------|--------|----|---------------------|-------|---------|-----------------------|-------|---------|
|                                  |        |    | Estimate            | SE    | P value | Estimate              | SE    | P value |
| <b>Sex</b>                       |        |    |                     |       |         |                       |       |         |
|                                  | Male   | 14 | Reference           |       |         |                       |       |         |
|                                  | Female | 44 | -8.000              | 1.570 | <0.001  | -4.169                | 1.464 | 0.004   |
| <b>Age</b>                       |        |    | -0.061              | 0.063 | 0.330   |                       |       |         |
| <b>Time</b>                      |        |    |                     |       |         |                       |       |         |
|                                  | T01    | 58 | Reference           |       |         |                       |       |         |
|                                  | T02    | 54 | 0.706               | 2.083 | 0.734   | -0.632                | 1.684 | 0.707   |
|                                  | T03    | 51 | 2.673               | 2.142 | 0.212   | 1.356                 | 2.518 | 0.590   |
|                                  | T04    | 46 | -4.126              | 2.028 | 0.042   | -6.278                | 2.723 | 0.021   |
|                                  | T05    | 40 | -1.694              | 2.292 | 0.460   | -2.200                | 3.041 | 0.469   |
|                                  | T06    | 38 | -2.208              | 2.456 | 0.369   | -3.237                | 2.771 | 0.243   |
|                                  | T07    | 36 | -7.750              | 2.052 | <0.001  | -8.233                | 2.379 | <0.001  |
| <b>Camp</b>                      |        |    |                     |       |         |                       |       |         |
|                                  | A      | 14 | 4.030               | 2.350 | 0.087   | 0.727                 | 2.223 | 0.744   |
|                                  | B      | 14 | -8.560              | 2.190 | <0.001  | -8.274                | 2.141 | <0.001  |
|                                  | C      | 12 | -1.440              | 2.210 | 0.515   | -2.895                | 2.021 | 0.152   |
|                                  | D      | 10 | -9.930              | 2.280 | <0.001  | -8.570                | 2.572 | <0.001  |
|                                  | E      | 5  | 1.110               | 2.690 | 0.679   | 1.012                 | 2.639 | 0.701   |
|                                  | F      | 3  | Reference           |       |         |                       |       |         |
| <b>Walking distance (km/day)</b> |        |    | -0.446              | 0.308 | 0.150   | -0.279                | 0.398 | 0.484   |
| <b>Chain length (m)</b>          |        |    | 1.040               | 0.420 | 0.013   | 0.680                 | 0.402 | 0.091   |
| <b>Chain hour (h/day)</b>        |        |    | -0.202              | 0.063 | 0.001   | -0.279                | 0.398 | 0.484   |
| <b>Roughage (kg/day)</b>         |        |    | 0.190               | 0.021 | <0.001  | 0.062                 | 0.029 | 0.032   |
| <b>Supplement (kg/day)</b>       |        |    | -0.140              | 0.077 | 0.069   | -0.044                | 0.135 | 0.746   |

SE =Standard error

Variables having a P value &lt;0.15 at the univariate analysis were included in the multivariate analysis.

**Supplementary Table 8.** Univariate and multivariate GEE analyses of demographic and camp management variables associated with triglyceride concentrations.

| Variables                        |        | N  | Univariate analysis |       |         | Multivariate analysis |        |         |
|----------------------------------|--------|----|---------------------|-------|---------|-----------------------|--------|---------|
|                                  |        |    | Estimate            | SE    | P value | Estimate              | SE     | P value |
| <b>Sex</b>                       |        |    |                     |       |         |                       |        |         |
|                                  | Male   | 14 | Reference           |       |         |                       |        |         |
|                                  | Female | 44 | -1.340              | 1.450 | 0.350   |                       |        |         |
| <b>Age</b>                       |        |    | -0.112              | 0.059 | 0.058   | -0.169                | 0.043  | <0.001  |
| <b>Time</b>                      |        |    |                     |       |         |                       |        |         |
|                                  | T01    | 58 | Reference           |       |         |                       |        |         |
|                                  | T02    | 54 | -3.270              | 1.990 | 0.100   | -3.268                | 1.632  | 0.045   |
|                                  | T03    | 51 | -9.870              | 1.880 | <0.001  | -16.591               | 2.121  | <0.001  |
|                                  | T04    | 46 | -13.440             | 1.840 | <0.001  | -23.257               | 2.306  | <0.001  |
|                                  | T05    | 40 | -13.370             | 2.330 | <0.001  | -20.313               | 2.436  | <0.001  |
|                                  | T06    | 38 | -17.870             | 1.970 | <0.001  | -23.831               | 2.217  | <0.001  |
|                                  | T07    | 36 | -18.040             | 1.910 | <0.001  | -23.178               | 2.033  | <0.001  |
| <b>Camp</b>                      |        |    |                     |       |         |                       |        |         |
|                                  | A      | 14 | -1.652              | 3.147 | 0.600   | -6.439                | 2.180  | 0.003   |
|                                  | B      | 14 | -0.464              | 3.135 | 0.880   | 3.811                 | 2.246  | 0.090   |
|                                  | C      | 12 | -4.550              | 3.010 | 0.130   | -6.312                | 2.085  | 0.002   |
|                                  | D      | 10 | -0.881              | 3.108 | 0.780   | 1.735                 | 2.561  | 0.498   |
|                                  | E      | 5  | -0.995              | 4.010 | 0.800   | -0.132                | 2.680  | 0.961   |
|                                  | F      | 3  | Reference           |       |         |                       |        |         |
| <b>Walking distance (km/day)</b> |        |    | 0.752               | 0.306 | 0.014   | -0.908                | 0.466  | 0.050   |
| <b>Chain length (m)</b>          |        |    | 0.448               | 0.369 | 0.230   |                       |        |         |
| <b>Chain hour (h/day)</b>        |        |    | -0.048              | 0.073 | 0.510   |                       |        |         |
| <b>Roughage (kg/day)</b>         |        |    | 0.102               | 0.023 | <0.001  | 0.095                 | 0.0267 | <0.001  |
| <b>Supplement (kg/day)</b>       |        |    | 0.333               | 0.067 | <0.001  | -0.642                | 0.103  | <0.001  |

SE =Standard error

Variables having a P value &lt;0.15 at the univariate analysis were included in the multivariate analysis.

**Supplementary Table 9.** Univariate and multivariate GEE analyses of demographic and camp management variables associated with low density lipoprotein concentrations.

| Variables                        |        | N  | Univariate analysis |       |         | Multivariate analysis |       |         |
|----------------------------------|--------|----|---------------------|-------|---------|-----------------------|-------|---------|
|                                  |        |    | Estimate            | SE    | P value | Estimate              | SE    | P value |
| <b>Sex</b>                       |        |    |                     |       |         |                       |       |         |
|                                  | Male   | 14 | Reference           |       |         |                       |       |         |
|                                  | Female | 44 | -5.870              | 1.160 | <0.001  | -3.593                | 1.161 | 0.002   |
| <b>Age</b>                       |        |    | -0.031              | 0.048 | 0.510   |                       |       |         |
| <b>Time</b>                      |        |    |                     |       |         |                       |       |         |
|                                  | T01    | 58 | Reference           |       |         |                       |       |         |
|                                  | T02    | 54 | 0.520               | 1.550 | 0.737   | -2.455                | 1.497 | 0.101   |
|                                  | T03    | 51 | 2.620               | 1.670 | 0.117   | -4.340                | 2.651 | 0.102   |
|                                  | T04    | 46 | -4.440              | 1.450 | 0.002   | -12.632               | 2.851 | <0.001  |
|                                  | T05    | 40 | -4.000              | 1.680 | 0.017   | -10.417               | 2.875 | <0.001  |
|                                  | T06    | 38 | -3.430              | 1.810 | 0.058   | -10.254               | 2.705 | <0.001  |
|                                  | T07    | 36 | -7.850              | 1.510 | <0.001  | -13.656               | 2.391 | <0.001  |
| <b>Camp</b>                      |        |    |                     |       |         |                       |       |         |
|                                  | A      | 14 | 2.946               | 1.752 | 0.093   | 1.659                 | 1.653 | 0.316   |
|                                  | B      | 14 | -6.677              | 1.649 | <0.001  | -5.444                | 1.600 | <0.001  |
|                                  | C      | 12 | -0.967              | 1.646 | 0.557   | -2.031                | 1.498 | 0.175   |
|                                  | D      | 10 | -7.036              | 1.733 | <0.001  | -7.115                | 1.909 | <0.001  |
|                                  | E      | 5  | 1.615               | 2.103 | 0.442   | 2.362                 | 2.050 | 0.249   |
|                                  | F      | 3  | Reference           |       |         |                       |       |         |
| <b>Walking distance (km/day)</b> |        |    | -0.300              | 0.252 | 0.230   | -0.502                | 0.307 | 0.102   |
| <b>Chain length (m)</b>          |        |    | 0.658               | 0.353 | 0.063   | 0.515                 | 0.373 | 0.167   |
| <b>Chain hour (h/day)</b>        |        |    | -0.227              | 0.049 | <0.001  | -0.017                | 0.051 | 0.739   |
| <b>Roughage (kg/day)</b>         |        |    | 0.139               | 0.016 | <0.001  | 0.011                 | 0.023 | 0.632   |
| <b>Supplement (kg/day)</b>       |        |    | -0.061              | 0.060 | 0.310   |                       |       |         |

SE =Standard error

Variables having a P value &lt;0.15 at the univariate analysis were included in the multivariate analysis.

**Supplementary Table 10.** Univariate and multivariate GEE analyses of demographic and camp management variables associated with high density lipoprotein concentrations.

| Variables                        |        | N  | Univariate analysis |       |         | Multivariate analysis |       |         |
|----------------------------------|--------|----|---------------------|-------|---------|-----------------------|-------|---------|
|                                  |        |    | Estimate            | SE    | P value | Estimate              | SE    | P value |
| <b>Sex</b>                       |        |    |                     |       |         |                       |       |         |
|                                  | Male   | 14 | Reference           |       |         |                       |       |         |
|                                  | Female | 44 | -1.766              | 0.499 | <0.001  | -0.467                | 0.451 | 0.301   |
| <b>Age</b>                       |        |    | -0.023              | 0.020 | 0.250   |                       |       |         |
| <b>Time</b>                      |        |    |                     |       |         |                       |       |         |
|                                  | T01    | 58 | Reference           |       |         |                       |       |         |
|                                  | T02    | 54 | -2.649              | 0.659 | <0.001  | -2.815                | 0.622 | <0.001  |
|                                  | T03    | 51 | -1.352              | 0.695 | 0.052   | -1.608                | 0.790 | 0.042   |
|                                  | T04    | 46 | -3.516              | 0.638 | <0.001  | -3.556                | 0.769 | <0.001  |
|                                  | T05    | 40 | -4.031              | 0.666 | <0.001  | -3.347                | 0.782 | <0.001  |
|                                  | T06    | 38 | -3.976              | 0.679 | <0.001  | -3.416                | 0.719 | <0.001  |
|                                  | T07    | 36 | -4.143              | 0.666 | <0.001  | -4.047                | 0.694 | <0.001  |
| <b>Camp</b>                      |        |    |                     |       |         |                       |       |         |
|                                  | A      | 14 | 1.037               | 0.802 | 0.200   |                       |       |         |
|                                  | B      | 14 | 0.341               | 0.887 | 0.700   |                       |       |         |
|                                  | C      | 12 | 0.109               | 0.758 | 0.890   |                       |       |         |
|                                  | D      | 10 | -0.632              | 0.818 | 0.440   |                       |       |         |
|                                  | E      | 5  | 0.288               | 0.788 | 0.710   |                       |       |         |
|                                  | F      | 3  | Reference           |       |         |                       |       |         |
| <b>Walking distance (km/day)</b> |        |    | 0.376               | 0.144 | 0.009   | 0.213                 | 0.126 | 0.090   |
| <b>Chain length (m)</b>          |        |    | 0.475               | 0.110 | <0.001  | 0.500                 | 0.107 | <0.001  |
| <b>Chain hour (h/day)</b>        |        |    | -0.086              | 0.015 | <0.001  | -0.071                | 0.015 | <0.001  |
| <b>Roughage (kg/day)</b>         |        |    | 0.022               | 0.006 | <0.001  | 0.009                 | 0.006 | 0.133   |
| <b>Supplement (kg/day)</b>       |        |    | 0.051               | 0.028 | 0.066   | -0.030                | 0.035 | 0.392   |

SE =Standard error

Variables having a P value &lt;0.15 at the univariate analysis were included in the multivariate analysis.

**Supplementary Table 11.** Univariate and multivariate GEE analyses of demographic and camp management variables associated with plasma glucose concentrations.

| Variables                        |        | N  | Univariate analysis |       |         | Multivariate analysis |       |         |
|----------------------------------|--------|----|---------------------|-------|---------|-----------------------|-------|---------|
|                                  |        |    | Estimate            | SE    | P value | Estimate              | SE    | P value |
| <b>Sex</b>                       |        |    |                     |       |         |                       |       |         |
|                                  | Male   | 14 | Reference           |       |         |                       |       |         |
|                                  | Female | 44 | -0.489              | 3.081 | 0.870   |                       |       |         |
| <b>Age</b>                       |        |    | -0.167              | 0.118 | 0.160   |                       |       |         |
| <b>Time</b>                      |        |    |                     |       |         |                       |       |         |
|                                  | T01    | 58 | Reference           |       |         |                       |       |         |
|                                  | T02    | 54 | 5.700               | 2.880 | 0.047   | 5.636                 | 2.293 | 0.014   |
|                                  | T03    | 51 | -5.620              | 3.070 | 0.067   | -6.949                | 2.485 | 0.005   |
|                                  | T04    | 46 | 1.250               | 3.320 | 0.706   | 2.660                 | 3.293 | 0.419   |
|                                  | T05    | 40 | 6.030               | 4.270 | 0.158   | 6.727                 | 4.908 | 0.170   |
|                                  | T06    | 38 | -4.770              | 4.070 | 0.241   | -5.871                | 5.198 | 0.259   |
|                                  | T07    | 36 | 18.020              | 4.760 | <0.001  | 16.336                | 4.346 | <0.001  |
| <b>Camp</b>                      |        |    |                     |       |         |                       |       |         |
|                                  | A      | 14 | 22.715              | 5.528 | <0.001  | 27.871                | 5.517 | <0.001  |
|                                  | B      | 14 | 5.560               | 5.069 | 0.273   | 3.091                 | 5.131 | 0.547   |
|                                  | C      | 12 | -0.429              | 5.229 | 0.935   | 1.419                 | 4.763 | 0.766   |
|                                  | D      | 10 | 5.158               | 5.064 | 0.308   | 5.384                 | 5.514 | 0.329   |
|                                  | E      | 5  | 13.362              | 6.286 | 0.034   | 17.898                | 6.121 | 0.003   |
|                                  | F      | 3  | Reference           |       |         |                       |       |         |
| <b>Walking distance (km/day)</b> |        |    | -1.013              | 0.599 | 0.091   | 2.162                 | 0.923 | 0.019   |
| <b>Chain length (m)</b>          |        |    | 1.964               | 0.807 | 0.015   | 0.269                 | 0.921 | 0.770   |
| <b>Chain hour (h/day)</b>        |        |    | -0.354              | 0.098 | <0.001  | -0.170                | 0.150 | 0.259   |
| <b>Roughage (kg/day)</b>         |        |    | 0.094               | 0.044 | 0.032   | -0.125                | 0.069 | 0.068   |
| <b>Supplement (kg/day)</b>       |        |    | -0.155              | 0.132 | 0.240   |                       |       |         |

SE =Standard error

Variables having a P value &lt;0.15 at the univariate analysis were included in the multivariate analysis.

**Supplementary Table 12.** Univariate and multivariate GEE analyses of demographic and camp management variables associated with serum insulin concentrations.

| Variables                        |        | N  | Univariate analysis |       |         | Multivariate analysis |       |         |
|----------------------------------|--------|----|---------------------|-------|---------|-----------------------|-------|---------|
|                                  |        |    | Estimate            | SE    | P value | Estimate              | SE    | P value |
| <b>Sex</b>                       |        |    |                     |       |         |                       |       |         |
|                                  | Male   | 14 | Reference           |       |         |                       |       |         |
|                                  | Female | 44 | 0.056               | 0.113 | 0.620   |                       |       |         |
| <b>Age</b>                       |        |    | -0.005              | 0.004 | 0.130   | 1.640                 | 3.730 | 0.997   |
| <b>Time</b>                      |        |    |                     |       |         |                       |       |         |
|                                  | T01    | 58 | Reference           |       |         |                       |       |         |
|                                  | T02    | 54 | -0.073              | 0.106 | 0.493   | -6.140                | 1.060 | 0.563   |
|                                  | T03    | 51 | 0.227               | 0.136 | 0.096   | 3.560                 | 1.540 | 0.021   |
|                                  | T04    | 46 | 0.226               | 0.131 | 0.084   | 4.500                 | 2.010 | 0.025   |
|                                  | T05    | 40 | 0.299               | 0.172 | 0.083   | 4.890                 | 2.140 | 0.022   |
|                                  | T06    | 38 | 0.218               | 0.140 | 0.121   | 4.420                 | 1.970 | 0.025   |
|                                  | T07    | 36 | 0.223               | 0.167 | 0.182   | 3.400                 | 1.830 | 0.064   |
| <b>Camp</b>                      |        |    |                     |       |         |                       |       |         |
|                                  | A      | 14 | 0.757               | 0.138 | <0.001  | 9.140                 | 1.610 | <0.001  |
|                                  | B      | 14 | 0.232               | 0.111 | 0.037   | 1.580                 | 1.390 | 0.256   |
|                                  | C      | 12 | -0.007              | 0.108 | 0.950   | 7.000                 | 1.270 | 0.582   |
|                                  | D      | 10 | 0.214               | 0.126 | 0.090   | 4.240                 | 1.520 | 0.005   |
|                                  | E      | 5  | 0.352               | 0.144 | 0.015   | 4.670                 | 1.560 | 0.003   |
|                                  | F      | 3  | Reference           |       |         |                       |       |         |
| <b>Walking distance (km/day)</b> |        |    | -0.041              | 0.021 | 0.047   | 9.420                 | 3.200 | 0.003   |
| <b>Chain length (m)</b>          |        |    | 0.020               | 0.024 | 0.400   |                       |       |         |
| <b>Chain hour (h/day)</b>        |        |    | -0.004              | 0.003 | 0.140   | -4.940                | 4.890 | 0.312   |
| <b>Roughage (kg/day)</b>         |        |    | 0.001               | 0.001 | 0.485   |                       |       |         |
| <b>Supplement (kg/day)</b>       |        |    | -0.017              | 0.005 | 0.001   | 6.330                 | 9.520 | 0.506   |

SE =Standard error

Variables having a P value &lt;0.15 at the univariate analysis were included in the multivariate analysis.

**Supplementary Table 13.** Univariate and multivariate GEE analyses of demographic and camp management variables associated with glucose to insulin ratio.

| Variables                        |        | N  | Univariate analysis |        |         | Multivariate analysis |        |         |
|----------------------------------|--------|----|---------------------|--------|---------|-----------------------|--------|---------|
|                                  |        |    | Estimate            | SE     | P value | Estimate              | SE     | P value |
| <b>Sex</b>                       |        |    |                     |        |         |                       |        |         |
|                                  | Male   | 14 | Reference           |        |         |                       |        |         |
|                                  | Female | 44 | -48.500             | 33.300 | 0.150   | -51.720               | 31.020 | 0.096   |
| <b>Age</b>                       |        |    | 0.909               | 1.050  | 0.390   |                       |        |         |
| <b>Time</b>                      |        |    |                     |        |         |                       |        |         |
|                                  | T01    | 58 | Reference           |        |         |                       |        |         |
|                                  | T02    | 54 | 71.700              | 36.100 | 0.047   | 65.430                | 34.920 | 0.061   |
|                                  | T03    | 51 | -16.500             | 37.000 | 0.656   | -64.700               | 49.410 | 0.190   |
|                                  | T04    | 46 | -27.900             | 36.600 | 0.445   | -78.620               | 54.910 | 0.152   |
|                                  | T05    | 40 | -66.800             | 40.700 | 0.101   | -95.090               | 49.580 | 0.055   |
|                                  | T06    | 38 | -105.700            | 39.300 | 0.007   | -135.560              | 48.770 | 0.005   |
|                                  | T07    | 36 | -76.600             | 44.600 | 0.086   | -93.240               | 48.040 | 0.052   |
| <b>Camp</b>                      |        |    |                     |        |         |                       |        |         |
|                                  | A      | 14 | -149.600            | 37.000 | <0.001  | -164.81               | 37.920 | <0.001  |
|                                  | B      | 14 | -91.500             | 38.600 | 0.018   | -78.020               | 40.190 | 0.052   |
|                                  | C      | 12 | 12.000              | 39.700 | 0.763   | -12.490               | 39.810 | 0.754   |
|                                  | D      | 10 | -72.600             | 38.500 | 0.059   | -67.000               | 44.800 | 0.135   |
|                                  | E      | 5  | -98.500             | 42.500 | 0.020   | -77.610               | 43.760 | 0.076   |
|                                  | F      | 3  | Reference           |        |         |                       |        |         |
| <b>Walking distance (km/day)</b> |        |    | 15.390              | 6.470  | 0.017   | -1.600                | 9.860  | 0.871   |
| <b>Chain length (m)</b>          |        |    | 0.562               | 7.203  | 0.940   |                       |        |         |
| <b>Chain hour (h/day)</b>        |        |    | -1.246              | 0.901  | 0.170   |                       |        |         |
| <b>Roughage (kg/day)</b>         |        |    | 0.294               | 0.385  | 0.444   |                       |        |         |
| <b>Supplement (kg/day)</b>       |        |    | 2.590               | 1.390  | 0.062   | -3.910                | 2.590  | 0.131   |

SE =Standard error

Variables having a P value &lt;0.15 at the univariate analysis were included in the multivariate analysis.



**Supplementary Table 14.** Univariate and multivariate GEE analyses of demographic and camp management variables associated with serum fructosamine concentrations.

| Variables                        |        | N  | Univariate analysis |       |         | Multivariate analysis |       |         |
|----------------------------------|--------|----|---------------------|-------|---------|-----------------------|-------|---------|
|                                  |        |    | Estimate            | SE    | P value | Estimate              | SE    | P value |
| <b>Sex</b>                       |        |    |                     |       |         |                       |       |         |
|                                  | Male   | 14 | Reference           |       |         |                       |       |         |
|                                  | female | 44 | -0.021              | 0.014 | 0.130   | -3.642                | 1.332 | 0.006   |
| <b>Age</b>                       |        |    | 0.000               | 0.001 | 0.700   |                       |       |         |
| <b>Time</b>                      |        |    |                     |       |         |                       |       |         |
|                                  | T01    | 58 | Reference           |       |         |                       |       |         |
|                                  | T02    | 54 | 9.110               | 1.832 | 0.996   | 3.233                 | 1.762 | 0.854   |
|                                  | T03    | 51 | 2.042               | 1.822 | 0.264   | 3.582                 | 2.392 | 0.134   |
|                                  | T04    | 46 | -2.443              | 1.852 | 0.895   | 7.123                 | 2.472 | 0.773   |
|                                  | T05    | 40 | 7.732               | 2.092 | <0.001  | 8.572                 | 2.782 | 0.002   |
|                                  | T06    | 38 | 1.241               | 2.532 | <0.001  | 1.321                 | 3.052 | 1.605   |
|                                  | T07    | 36 | 8.442               | 2.112 | <0.001  | 9.472                 | 2.492 | <0.001  |
| <b>Camp</b>                      |        |    |                     |       |         |                       |       |         |
|                                  | A      | 14 | 0.029               | 0.023 | 0.209   | 3.392                 | 2.042 | 0.095   |
|                                  | B      | 14 | 0.030               | 0.024 | 0.212   | 3.602                 | 2.222 | 0.104   |
|                                  | C      | 12 | 0.035               | 0.025 | 0.165   | 2.202                 | 2.502 | 0.377   |
|                                  | D      | 10 | 0.036               | 0.025 | 0.153   | 3.582                 | 2.312 | 0.121   |
|                                  | E      | 5  | 0.065               | 0.033 | 0.045   | 6.262                 | 3.002 | 0.037   |
|                                  | F      | 3  | Reference           |       |         |                       |       |         |
| <b>Walking distance (km/day)</b> |        |    | 0.011               | 0.003 | <0.001  | -7.533                | 3.253 | 0.020   |
| <b>Chain length (m)</b>          |        |    | 0.004               | 0.003 | 0.290   |                       |       |         |
| <b>Chain hour (h/day)</b>        |        |    | 0.002               | 0.001 | 0.001   | 4.524                 | 8.504 | 0.595   |
| <b>Roughage (kg/day)</b>         |        |    | -0.000              | 0.000 | 0.094   | 7.265                 | 2.384 | 0.761   |
| <b>Supplement (kg/day)</b>       |        |    | -0.002              | 0.001 | 0.010   | 1.423                 | 1.293 | 0.270   |

SE =Standard error

Variables having a P value &lt;0.15 at the univariate analysis were included in the multivariate analysis.

**Supplementary Table 15.** Univariate and multivariate GEE analyses of demographic and camp management variables associated with body condition scores.

| Variables                        |        | N  | Univariate analysis |       |         | Multivariate analysis |       |         |
|----------------------------------|--------|----|---------------------|-------|---------|-----------------------|-------|---------|
|                                  |        |    | Estimate            | SE    | P value | Estimate              | SE    | P value |
| <b>Sex</b>                       |        |    |                     |       |         |                       |       |         |
|                                  | Male   | 14 | Reference           |       |         |                       |       |         |
|                                  | Female | 44 | 0.345               | 0.118 | 0.003   | 0.495                 | 0.117 | <0.001  |
| <b>Age</b>                       |        |    | 0.008               | 0.006 | 0.160   |                       |       |         |
| <b>Time</b>                      |        |    |                     |       |         |                       |       |         |
|                                  | T01    | 58 | Reference           |       |         |                       |       |         |
|                                  | T02    | 54 | -0.265              | 0.163 | 0.100   | -0.238                | 0.130 | 0.067   |
|                                  | T03    | 51 | -0.251              | 0.170 | 0.140   | -0.280                | 0.167 | 0.094   |
|                                  | T04    | 46 | -0.700              | 0.179 | <0.001  | -0.724                | 0.183 | <0.001  |
|                                  | T05    | 40 | -1.157              | 0.181 | <0.001  | -1.176                | 0.184 | <0.001  |
|                                  | T06    | 38 | -1.255              | 0.163 | <0.001  | -1.237                | 0.168 | <0.001  |
|                                  | T07    | 36 | -1.197              | 0.177 | <0.001  | -1.204                | 0.162 | <0.001  |
| <b>Camp</b>                      |        |    |                     |       |         |                       |       |         |
|                                  | A      | 14 | 1.346               | 0.219 | <0.001  | 1.509                 | 0.238 | <0.001  |
|                                  | B      | 14 | 1.988               | 0.224 | <0.001  | 1.993                 | 0.218 | <0.001  |
|                                  | C      | 12 | 1.309               | 0.226 | <0.001  | 1.270                 | 0.237 | <0.001  |
|                                  | D      | 10 | 2.021               | 0.238 | <0.001  | 1.812                 | 0.268 | <0.001  |
|                                  | E      | 5  | 1.235               | 0.254 | <0.001  | 1.289                 | 0.265 | <0.001  |
|                                  | F      | 3  | Reference           |       |         |                       |       |         |
| <b>Walking distance (km/day)</b> |        |    | 0.113               | 0.029 | <0.001  | 0.013                 | 0.038 | 0.742   |
| <b>Chain length (m)</b>          |        |    | -0.024              | 0.023 | 0.300   |                       |       |         |
| <b>Chain hour (h/day)</b>        |        |    | -0.001              | 0.006 | 0.790   |                       |       |         |
| <b>Roughage (kg/day)</b>         |        |    | -0.004              | 0.002 | 0.089   | -0.000                | 0.003 | 0.856   |
| <b>Supplement (kg/day)</b>       |        |    | 0.045               | 0.006 | <0.001  | 0.043                 | 0.007 | <0.001  |

SE =Standard error

Variables having a P value &lt;0.15 at the univariate analysis were included in the multivariate analysis.

**Supplementary Table 16.** Seasonal effects on physiological parameters in Asian elephants. Mean  $\pm$  SEM and range values for muscle and liver enzymes, lipid profiles, metabolic function and body condition scores (BCS) of captive Asian elephants (n = 58) in six Thailand tourist camps during the COVID-19 pandemic international travel ban each year between April 2020 – April 2022.

| Parameters                       | Summer                                         | Rainy                                          | Winter                                         |
|----------------------------------|------------------------------------------------|------------------------------------------------|------------------------------------------------|
| <b>Muscle and liver enzymes</b>  |                                                |                                                |                                                |
| Creatine kinase (U/L)            | 278.0 $\pm$ 12.2 <sup>a</sup><br>(130.6-531.2) | 337.0 $\pm$ 15.4 <sup>b</sup><br>(161.2-578.5) | 371.0 $\pm$ 21.6 <sup>b</sup><br>(136.4-797.4) |
| Aspartate aminotransferase (U/L) | 20.7 $\pm$ 0.6 <sup>a</sup><br>(14.0-29.9)     | 21.5 $\pm$ 0.6 <sup>a</sup><br>(14.9-38.0)     | 22.1 $\pm$ 0.8 <sup>a</sup><br>(13.1-46.0)     |
| Alkaline phosphatase (U/L)       | 51.8 $\pm$ 2.4 <sup>a</sup><br>(24.5-99.0)     | 48.9 $\pm$ 2.7 <sup>a</sup><br>(20.0-114.5)    | 56.3 $\pm$ 2.7 <sup>a</sup><br>(28.2-108.5)    |
| Gamma-glutamyl transferase (U/L) | 5.0 $\pm$ 0.3 <sup>a</sup><br>(0.4-12.0)       | 5.2 $\pm$ 0.2 <sup>a</sup><br>(2.8-10.1)       | 5.4 $\pm$ 0.2 <sup>a</sup><br>(3.1-9.4)        |
| <b>Lipid profiles</b>            |                                                |                                                |                                                |
| Total cholesterol (mg/dl)        | 45.4 $\pm$ 1.6 <sup>a</sup><br>(26.0-80.7)     | 46.4 $\pm$ 1.2 <sup>a</sup><br>(29.9-69.3)     | 46.8 $\pm$ 1.4 <sup>a</sup><br>(29.6-76.1)     |
| Triglycerides (mg/dl)            | 20.2 $\pm$ 1.4 <sup>a</sup><br>(13.5-38.0)     | 26.1 $\pm$ 1.9 <sup>b</sup><br>(12.9-46.5)     | 22.0 $\pm$ 1.7 <sup>ab</sup><br>(10.6-38.8)    |
| Low density lipoprotein (mg/dl)  | 29.0 $\pm$ 1.1 <sup>a</sup><br>(15.8-51.1)     | 30.0 $\pm$ 1.0 <sup>a</sup><br>(16.8-45.6)     | 31.2 $\pm$ 1.1 <sup>a</sup><br>(16.4-50.5)     |
| High density lipoprotein (mg/dl) | 12.7 $\pm$ 0.4 <sup>b</sup><br>(8.8-26.6)      | 11.4 $\pm$ 0.3 <sup>a</sup><br>(8.0-18.0)      | 12.2 $\pm$ 0.4 <sup>ab</sup><br>(8.3-19.3)     |
| <b>Metabolic function</b>        |                                                |                                                |                                                |
| Plasma glucose (mg/dl)           | 93.4 $\pm$ 1.9 <sup>b</sup><br>(68.8-127.6)    | 94.3 $\pm$ 2.3 <sup>b</sup><br>(65.8-139.5)    | 83.4 $\pm$ 2.2 <sup>a</sup><br>(56.5-139.9)    |
| Serum insulin ( $\mu$ g/l)       | 0.84 $\pm$ 0.10 <sup>a</sup><br>(0.10-3.64)    | 0.59 $\pm$ 0.08 <sup>a</sup><br>(0.15-2.41)    | 0.87 $\pm$ 0.12 <sup>a</sup><br>(0.10-3.46)    |
| Glucose to insulin ratio         | 270.0 $\pm$ 17.2 <sup>ab</sup><br>(65.0-739.4) | 327.0 $\pm$ 21.5 <sup>b</sup><br>(61.4-843.5)  | 246.0 $\pm$ 20.9 <sup>a</sup><br>(53.7-756.9)  |
| Serum fructosamine (mM)          | 1.39 $\pm$ 0.01 <sup>a</sup><br>(1.16-1.61)    | 1.41 $\pm$ 0.01 <sup>a</sup><br>(1.15-1.58)    | 1.44 $\pm$ 0.01 <sup>a</sup><br>(1.29-1.76)    |
| Body condition score (1-5)       | 3.7 $\pm$ 0.1 <sup>a</sup><br>(2.0-5.0)        | 3.5 $\pm$ 0.1 <sup>a</sup><br>(2.0-5.0)        | 3.7 $\pm$ 0.1 <sup>a</sup><br>(2.0-5.0)        |

<sup>a,b,c</sup>Row values for each parameter differ significantly across the summer, rainy and winter seasons (P <0.05).
