# Supplementary material for: Physiological changes in captive elephants in Northern Thailand as a result of the COVID-19 tourism ban – muscle, liver, metabolic function, and body condition
Source: PubMed Central journal article supplement (PMC10764436; doi:10.3389/fvets.2023.1303537), 2023-12-21
Supplement: Data_Sheet_2.pdf [file Data_Sheet_2.pdf]

## Figures

### During COVID-19

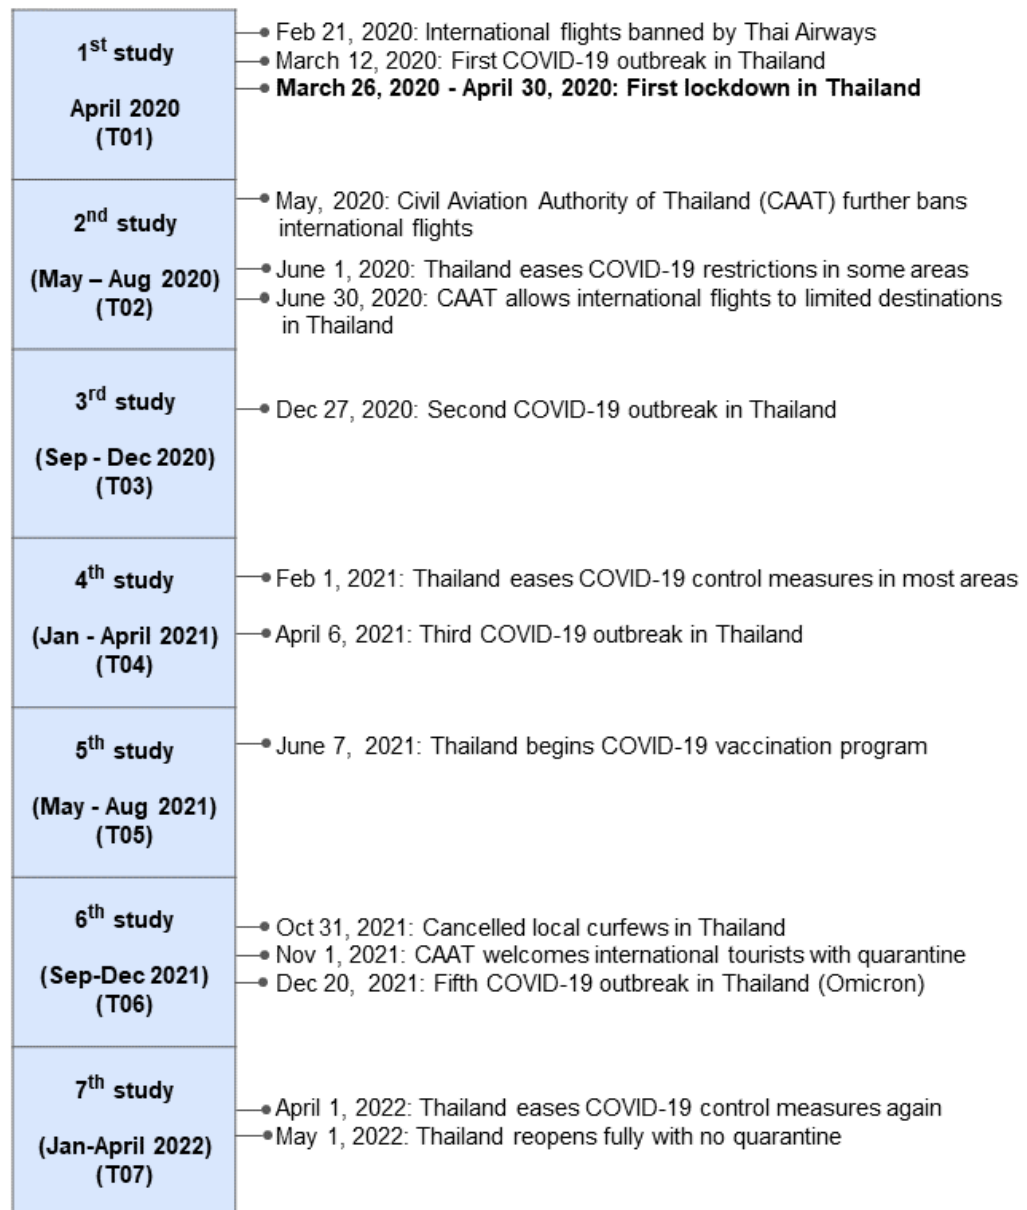

(World Health Organization Thailand, 2022)

**Figure 1.** Associated events during the COVID-19 pandemic beginning in April 2020 (T01), and across seven periods of management surveys and blood sample collections (T02-T07) during the 2 years of the study from Supanta et al. (12).

**A.**

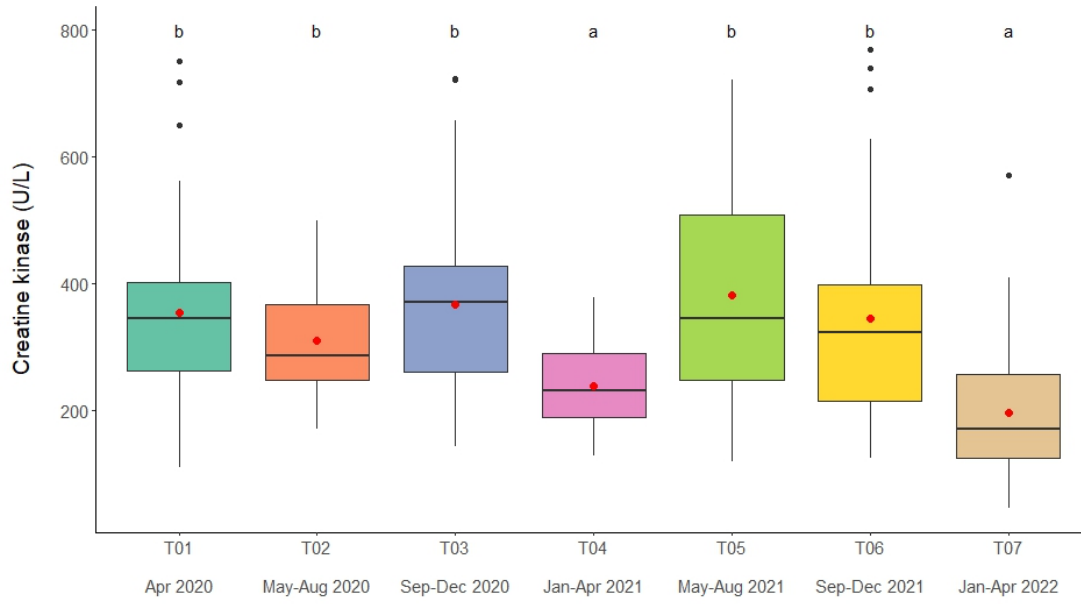

**B.**

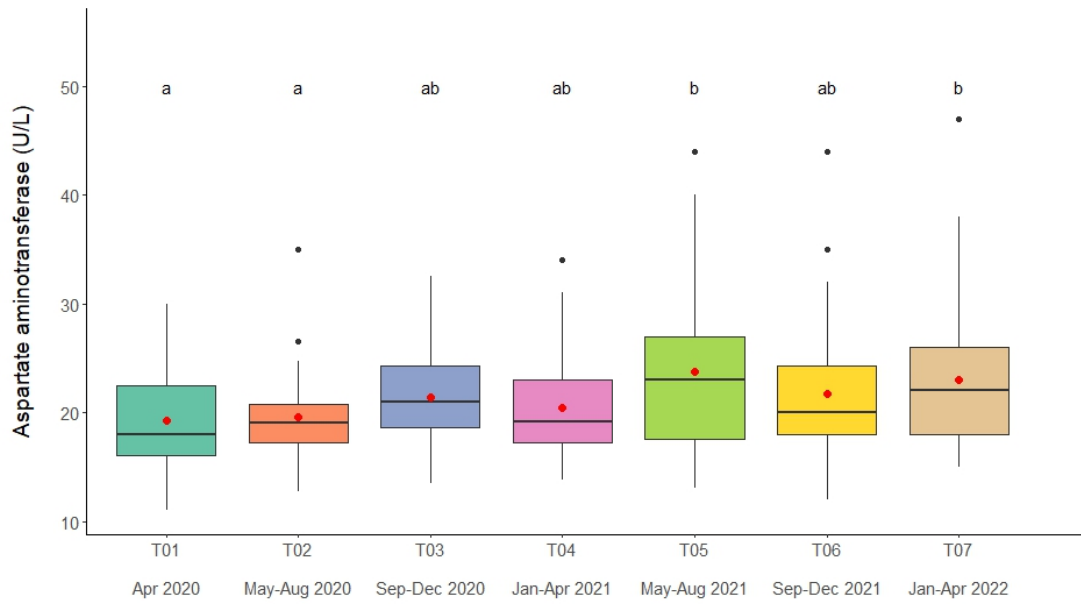

C.

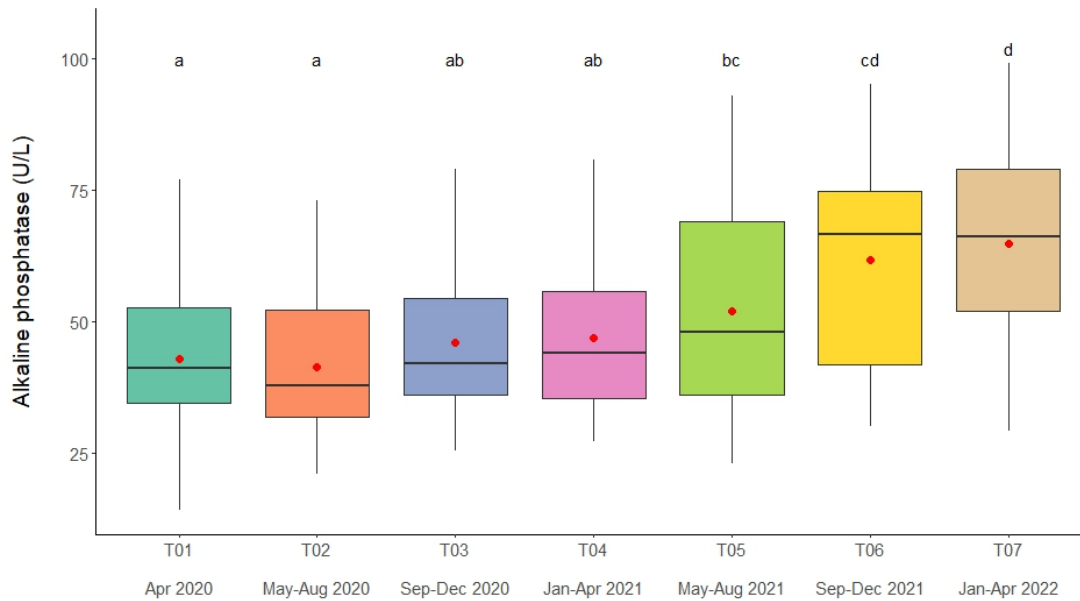

D.

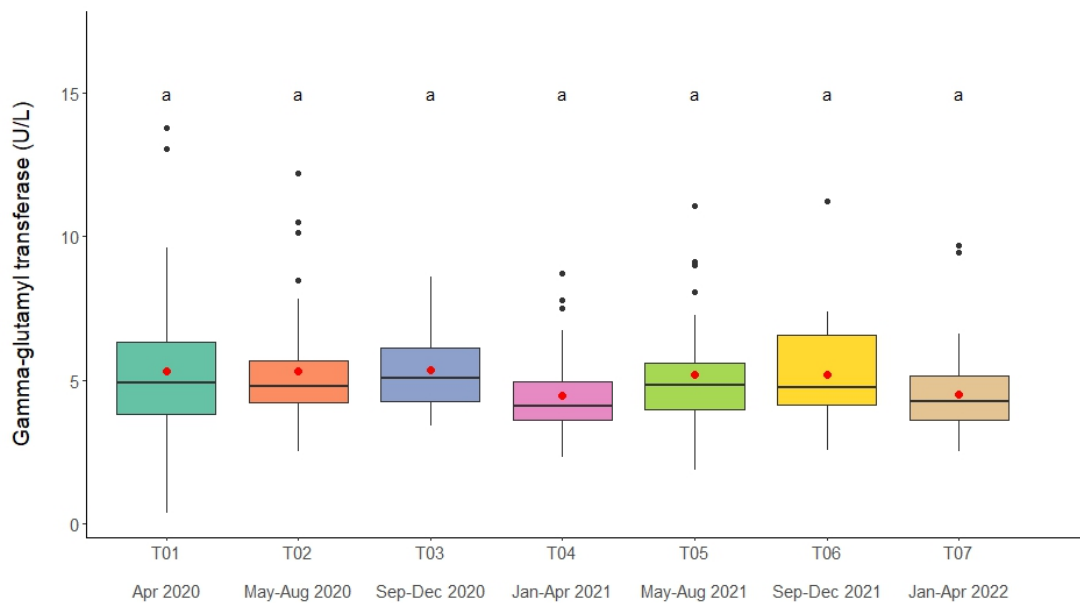

**Figure 2.** Boxplots of muscle and liver enzyme concentrations, (A) creatine kinase, (B) aspartate aminotransferase, (C) alkaline phosphatase, and (D) gamma-glutamyl transferase in captive Asian elephants (n= 58) over a 2-year period during the COVID-19 pandemic and international travel ban. Each plot shows the median (horizontal line), mean (red dot), 25% and 75% quartile ranges, and minimum and maximum ranges (whiskers). Different letters indicate significant differences between time periods ( $P < 0.001$ ).

**A.**

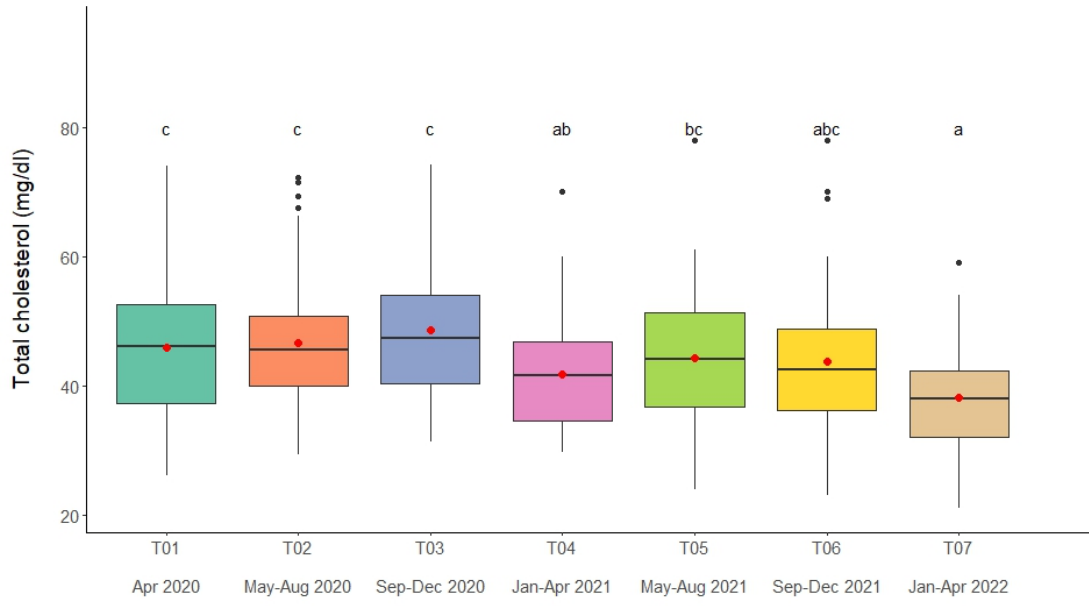

**B.**

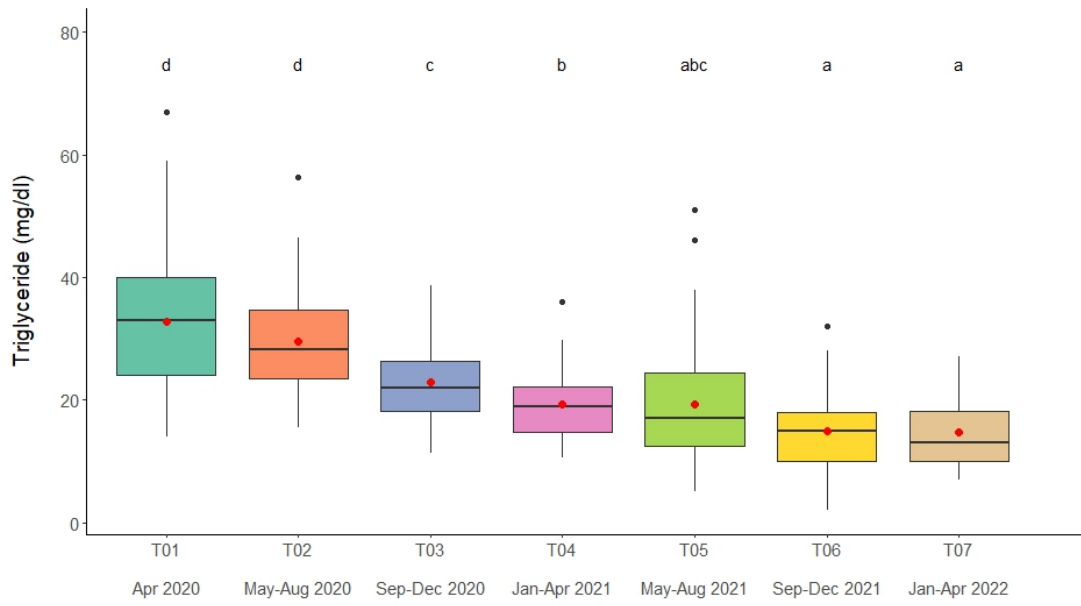

C.

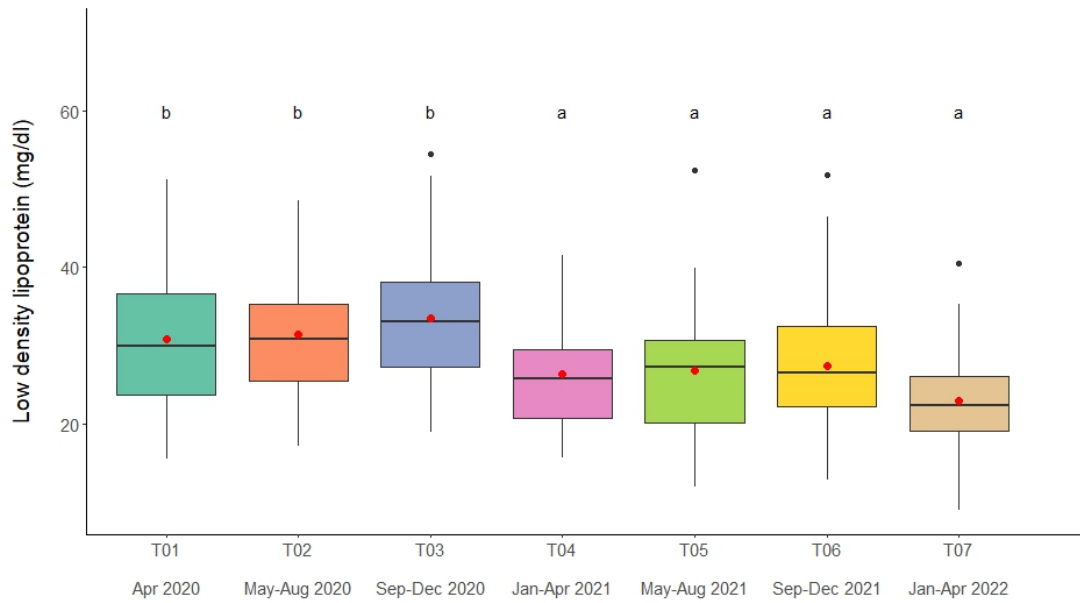

D.

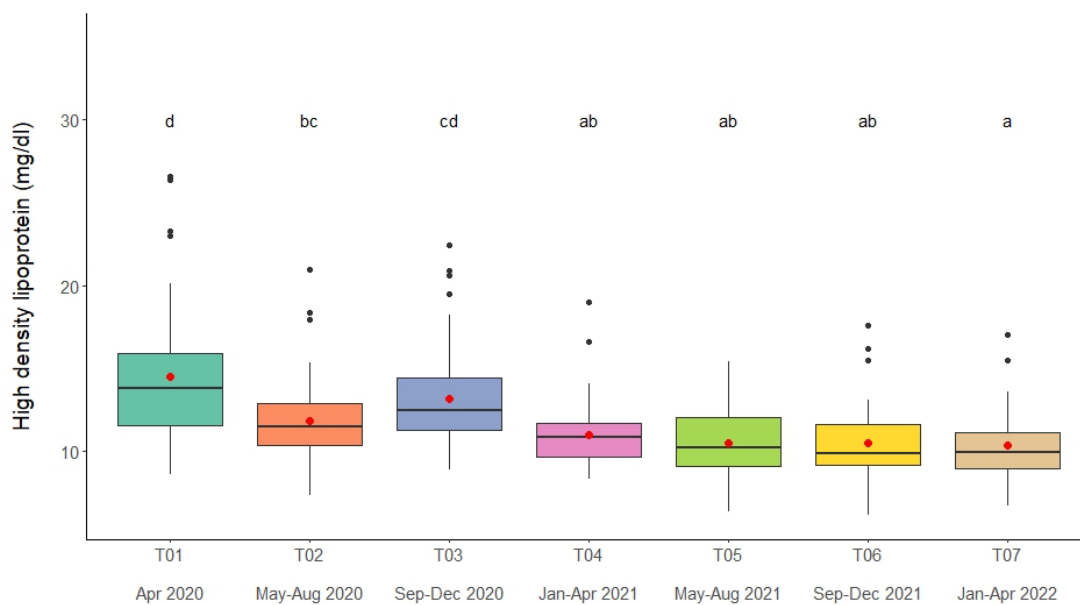

**Figure 3.** Boxplots of lipid profiles (A) total cholesterol, (B) triglycerides, (C) low density lipoproteins, and (D) high density lipoproteins in captive Asian elephants (n=58) over a 2-year period during the COVID-19 pandemic and international travel ban. Each plot shows the median (horizontal line), mean (red dot), 25% and 75% quartile ranges, and minimum and maximum ranges (whiskers). Different letters indicate significant differences between time periods (P < 0.001).

**A.**

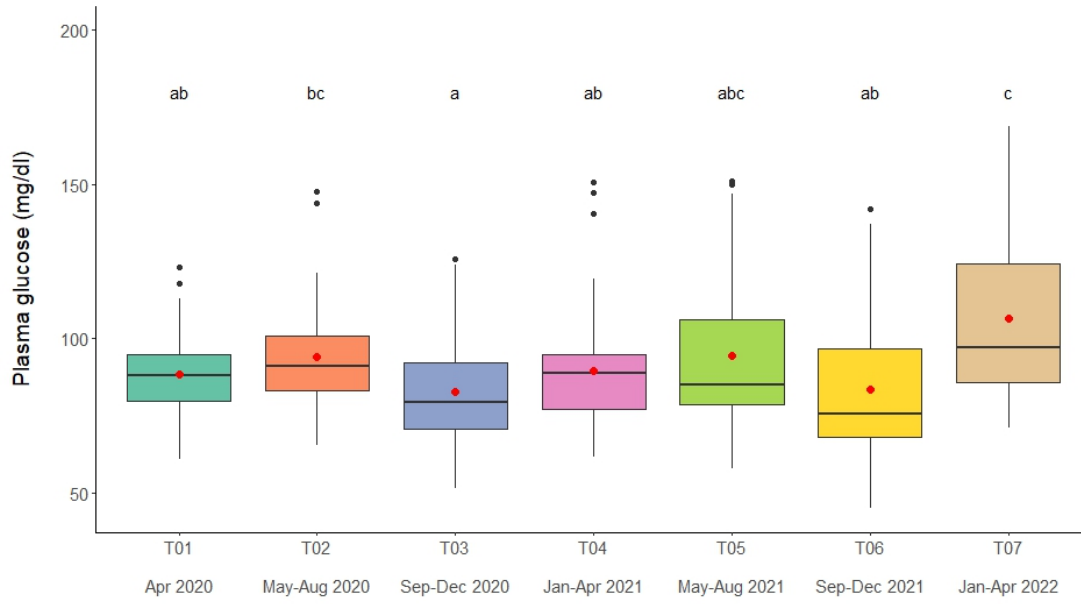

**B.**

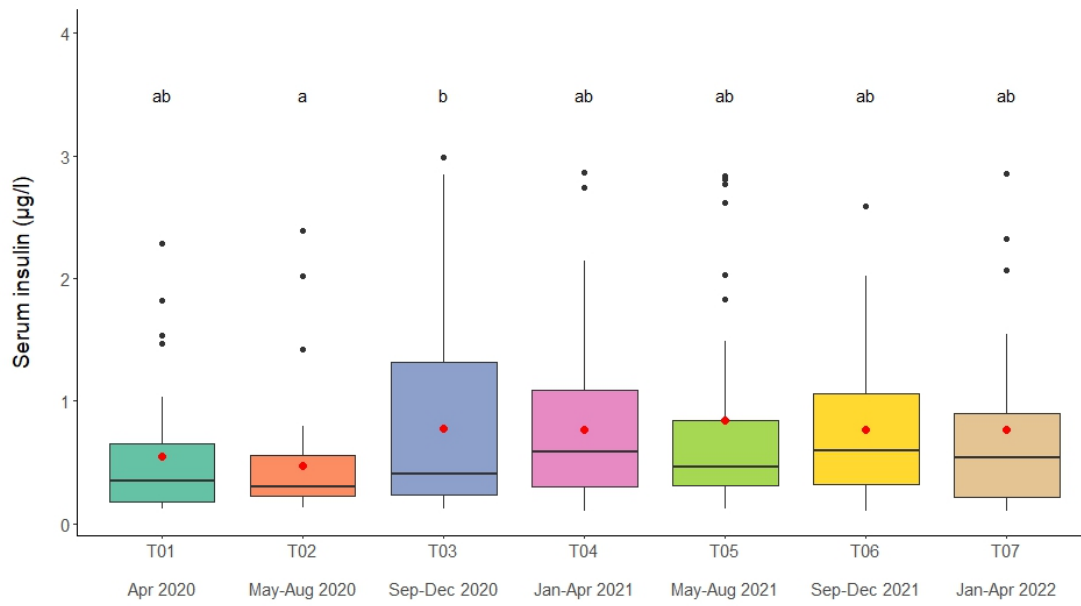

C.

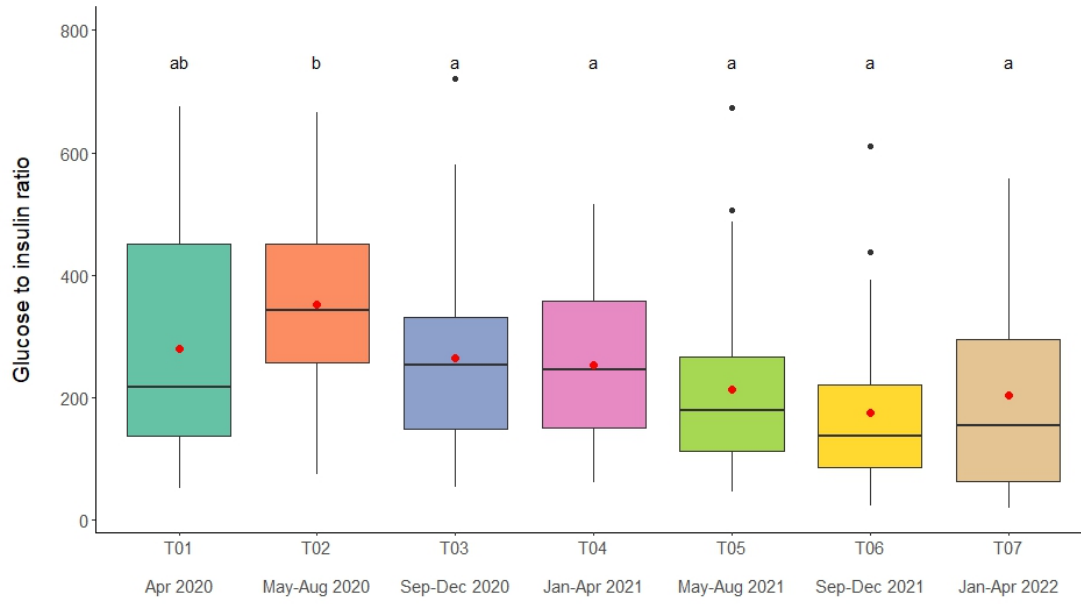

D.

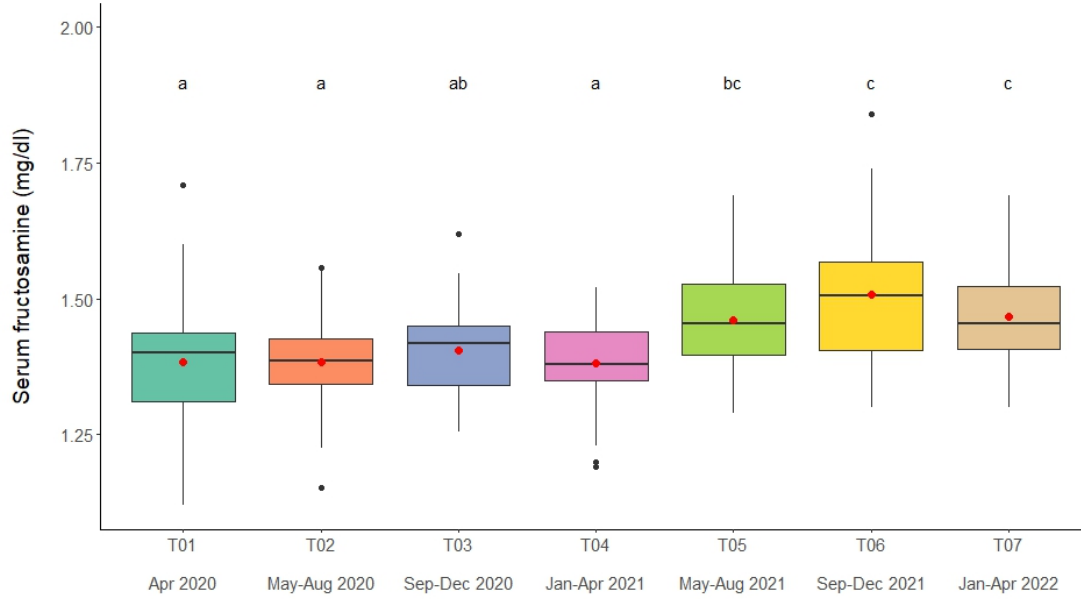

**E.**

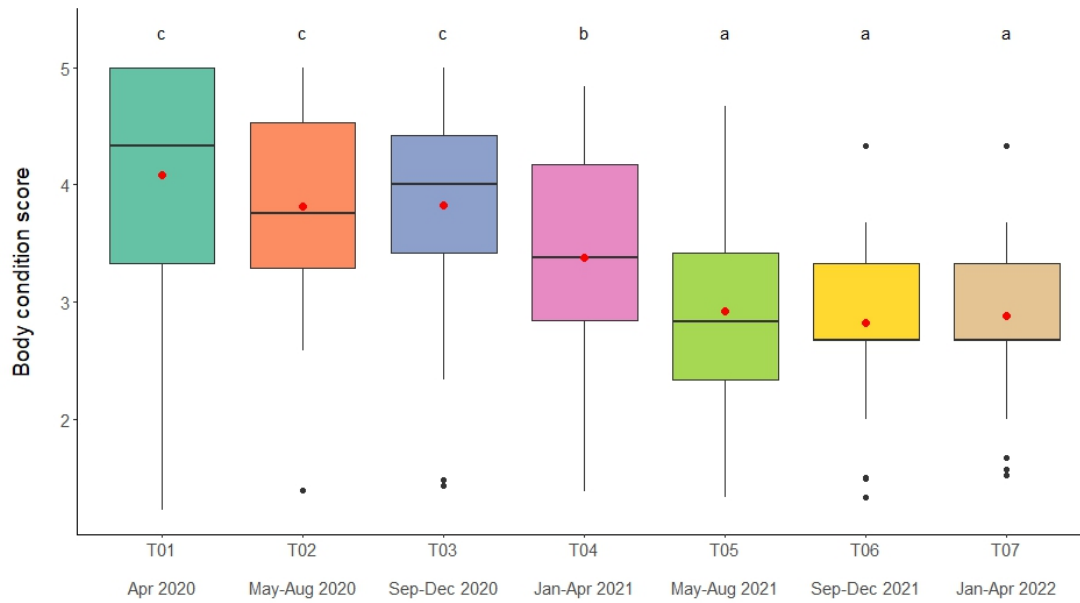

**Figure 4.** Boxplots of (A) plasma glucose, (B) serum insulin (C) glucose to insulin ratio (D) serum fructosamine and (E) body condition scores in captive Asian elephants (n=58) over a 2-year period during the COVID-19 pandemic and international travel ban. Each plot shows the median (horizontal line), mean (red dot), 25% and 75% quartile ranges, and minimum and maximum ranges (whiskers). Different letters indicate significant differences between time periods ( $P < 0.001$ ).
