# Supplementary material for: Physiological changes in captive elephants in Northern Thailand as a result of the COVID-19 tourism ban – muscle, liver, metabolic function, and body condition
Source: PubMed Central journal article supplement (PMC10764436; doi:10.3389/fvets.2023.1303537), 2023-12-21
Supplement: Data_Sheet_3.pdf [file Data_Sheet_3.pdf]

**Mahout questionnaire**  
**Time.....**

**Interviewer**.....  
**Date**.....  
**Camp name**.....

**1. Mahout information**

1.1 Name.....  
1.2 Sex:  Male  Female  
1.3 Age.....years old  
1.4 Race.....  
1.5 Nationality  
1.6 Present address.....  
1.7 Economic status  
Income:  
 Daily.....baht per day  
 Monthly.....baht per month  
Part-time:  
 No  
 Yes: please clarify .....

Income:  
 Daily.....baht per day  
 Monthly.....baht per month  
Total income per month.....baht

1.8 Cause of decreasing salary  
.....

**2. Elephant information**

2.1 Elephant name:  
 Plai  Sridor  Pung.....  
2.2 Sex:  Male  Female  
2.3 Age.....  
2.4 BCS (Body condition score).....  
2.5 Weight.....

2.3 Behavior changing  
 No  
 Yes: please clarify.....  
 Musth duration.....  
 Heat duration.....

**3. Elephant working**

3.1 Elephant's activity or work  
 No  
 Carry tourist  
 Trek  
 Show  
 Bathing  
 Others.....

3.2 Period of working  
Time to start.....  
Time to stop.....

3.3 Break time  
 No  
 Yes: please clarify .....

3.4 Restraint equipment  
 No  
 Yes: please clarify .....

**Type of restraint equipment**  
 Hook  Nail  Knife  
 Slingshot  Chain  Others.....

When mahout use the restraint equipment?  
.....

3.5 Trekking elephant  
How many rounds per day? .....rounds

3.6 How many kilometers of the track per round? ..... kilometers

3.7 How long does it take for 1 round? .....minutes

3.8 How much walking rate?..... km/hr

3.9 Other activities?  
 No  Yes: please clarify .....

3.10 Problem after work  
 No  
 Yes: please clarify .....

3.11 Cause of injury  
 Restraint equipment: please clarify.....  
 Saddle equipment  
 Improper pathway  
 Elephant attack

- Weakness from hard work
- Others.....

3.12 Day off

- No  Yes: please clarify .....

**4. Rest area**

4.1 Do they chain elephant in rest area?

- No  Yes

Type of rest area

- Forest:  Chain  Free
- Field:  Chain  Free
- Outdoor in camp:  Chain  Free
- Chain under tree
- Chain in building
- Corral:  Chain  Free

4.2 Number of elephants each type of rest area.....elephant per rest area

4.3 When do they chain elephant in rest area?

- All the time  During no work  Nighttime

How long you chain elephant in rest area?.....hours

4.4 Chain

|        | Length of chain | Size of chain |
|--------|-----------------|---------------|
| Male   | .....meters     | .....units    |
| Female | .....meters     | .....units    |

**5. Nutrition**

5.1.1 Roughage and supplement food

- Napier grass  Banana tree  Bana grass
- Sugar cane  Corn stalk  Hey
- Local roughage: please clarify.....

| Amount/day | No. of feeding/ day | Amount/feeding |
|------------|---------------------|----------------|
|            |                     |                |

5.1.2 Concentrate food

- No
- Yes:  Pellet food elephant (% protein) .....

- Others.....

| Amount/day | No. of feeding/ day | Amount/feeding |
|------------|---------------------|----------------|
|            |                     |                |

5.1.3 Others

- No
- Yes:  Tablet vitamin  Herb
- Sticky rice  Tamarind
- Others.....

| Amount/day | No. of feeding/ day | Amount/feeding |
|------------|---------------------|----------------|
|            |                     |                |
